1 **Effects of Starter Feeds of Different Physical Forms on Rumen Fermentation and**  
2 **Microbial Composition for Pre-weaning and Post-weaning Lambs**

3

4 Yong Li,<sup>\*</sup> Yanli Guo,<sup>#</sup> Chengxin Zhang, Xiaofang Cai, Peng Liu, Cailian Li

5

6 College of Animal Science and Technology, Gansu Agricultural University, Lanzhou

7 730070, P.R. China

8

9

10

11

12

13

14

15

16

17

18

19 <sup>#</sup>Address correspondence to Yanli Guo, [guoyl@gsau.edu.cn](mailto:guoyl@gsau.edu.cn).

20 <sup>\*</sup>Present address: Yong Li, Zhoukou Vocational and Technical College, Zhoukou, P. R.

21 China.

22 **ABSTRACT**

23 This study aimed to evaluate the effects of starter feeds of different physical forms  
24 on rumen fermentation and microbial composition for lambs. Twenty-four eight-day-old  
25 male Hu lambs ( $5.04 \pm 0.75$  kg body weight) were fed either milk replacer (MR) and  
26 pelleted starter feed (PS), or MR and textured starter feed (TS) in pre-weaning (day 8 to  
27 35) and post-weaning (day 36 to 42) lambs. And the MR was fed by bottles to lambs at 2%  
28 of body weight at day 8 divided as three equal amounts at 08:00, 14:00 and 20:00 in  
29 pre-weaning. And the lambs were readily availed starter feeds and clean fresh water in the  
30 whole experiment. Six lambs for each treatment were euthanized at day 21 or 42 for  
31 sampling. The results showed the total volatile fatty acids, propionate and butyrate of  
32 rumen liquid in TS groups were all higher than them in PS groups respectively for  
33 pre-weaning and post-weaning lambs ( $P < 0.05$ ), and the pH of rumen liquid in TS group  
34 was lower than it in PS group for post-weaning lambs ( $P < 0.05$ ). Moreover, the pH of  
35 rumen and OTUs in TS group had trends to lower than them in PS group for pre-weaned  
36 lambs ( $P = 0.061$ ,  $P = 0.066$ ). TS established the predominant Phylum, *Bacteroidetes*,  
37 earlier than PS, and increased significantly the relative abundances of *Sharpea* compared  
38 to PS at level of genus ( $P < 0.05$ ) for pre-weaning and post-weaning lambs. TS were more  
39 benefits to trigger rumen development for lambs.

40 **IMPORTANCE** Early use of starter feed could trigger rumen fermentation and  
41 establishment of dominant flora, which were in favour of growth and development of  
42 rumen for ruminants. The physical form of starter feed is one of the important factors to

43 promote rumen fermentation and establishment of dominant flora for ruminants of  
44 transition. However, limited study on effects of physical forms of starter feeds, especially  
45 the texturized starters containing steam-flaked grains, to rumen fermentative pattern and  
46 microbial composition for pre-weaning and post-weaning lambs to date. It was necessary  
47 to investigate the effects of physical form of starter feed on rumen fermentation and  
48 microbial composition for lambs. The significance of our research showed TS were better  
49 benefits to promote the rumen fermentation and establishment of dominant flora for  
50 lambs, which will greatly enhance our understanding of physical forms of starter feeds,  
51 leading to broader studies on rumen development for lambs.

52 **KEYWORDS:** starter feeds; physical forms; rumen fermentation; rumen microbial  
53 composition; lambs

## 54 **INTRODUCTION**

55 It is commonly known that a lot of complicated and diverse microbe, such as  
56 protozoan, bacteria, archeobacteria and fungi, existed in rumen of ruminant, whose  
57 interaction played an important role to maintain stable environments of rumen and health  
58 of animals (1). However, at birth, young ruminants did not possess anaerobic microbial  
59 population in their rumens. And establishment of rumen microbiota was very necessary to  
60 the physiological development of the rumens and the animal's abilities to convert plant  
61 feed into products that can be utilized by the animal for maintenance and production (2).  
62 Previous studies showed the introduction of solid diet around weaning could promote the  
63 establishment of anaerobic microbial ecosystem and formation of fermentation processes,

64 which were benefits to trigger the growth and development of the rumen (3).

65 Furthermore, processing of grain and ingredients of starter feeds and chemical and  
66 structural composition in dietary could affect fermentative pattern of rumen (4, 5).  
67 Feeding starters containing fine particles in form of mash or processed in form of pelleted  
68 could trigger rapid ruminal acid production from fermentation of carbohydrates (6),  
69 decreased ruminal pH (7). Consumption of starter feed containing highly fermentable  
70 carbohydrate by lambs or calves could increase the ruminal concentrations of volatile  
71 fatty acids (VFAs), particularly propionate and butyrate (8, 9), which was essential  
72 chemical stimulations for the rapid development of rumen epithelium (10). Furthermore,  
73 consumption of solid feed could promote the acquisition of anaerobic microbes and  
74 establishment of rumen fermentation (11).

75 Additionally, microbial colonization can also affect rumen development and function  
76 during early life, and the diversities and function of rumen microbe during early life was  
77 given concerned widely in recent years and next-generation sequencing was widely used  
78 to study rumen microbial ecology. Jami et al. and Li et al. found that the rumen microbe  
79 of prior to weaning calves has a similar functional capacity as that of a mature ruminant  
80 using next generation DNA (2, 12). Chen et al. studied the changes in bacterial diversity  
81 associated with epithelial tissue in the beef cow rumen during the transition to a  
82 high-grain diet (13). Jiao et al. taxonomic identified the ruminal epithelial bacterial  
83 diversity during rumen development in Goats (14). However, limited information is  
84 available on how changes in the physical forms of starter feeds, especially the texturized

85 starters containing steam-flaked grains, influence the rumen fermentative pattern and  
86 microbial composition for pre-weaning and post-weaning lambs to date. And there was  
87 not sufficient research on diversities and function of rumen microbe of starter feeds of  
88 different physical forms used next generation DNA for pre-weaning and post-weaning  
89 lambs.

90 Hence, the objectives of experiment were to elaborate the relation of effect of starter  
91 feeds of different physical forms on rumen fermentation and microbial composition for  
92 pre-weaning and post-weaning lambs by diversities and functions of rumen microbe  
93 (next-generation sequencing, 16S rDNA gene sequencing) so as to explain the reasons  
94 that effects of starter feeds of different physical forms on growth and development of  
95 rumen for pre-weaning and post-weaning lambs to certain extent.

## 96 **RESULTS AND ANALYSIS**

97 **Rumen fermentative parameters.** The total VFAs, propionate and butyrate of rumen in  
98 TS groups were all higher than them in PS groups respectively for pre-weaned and  
99 post-weaned lambs ( $P < 0.05$ ), and the pH of rumen in TS group was lower than it in PS  
100 group for post-weaned lambs ( $P < 0.05$ , Table 1). Moreover, the pH of rumen in TS group  
101 had trends to lower than it in PS group in pre-weaned lambs ( $P = 0.061$ ).

102 **Sequence qualities of 16S rRNA genes and alpha diversities of rumen microbe.** Raw  
103 sequences were joined together, optimized, quality controlled, then 1,648,195 high  
104 quality sequences were obtained. Every sample obtained 82,410<sup>↑</sup> V3-V4 16S r RNA  
105 effective tags averagely. The length of effective tags was between 416 bp-426 bp. The

106 2,248 OTUs were obtained in all, and every sample had 562 OTUs averagely (Fig 1).  
107 Rarefaction curve of 16S rRNA gene showed Good' coverage was higher than 0.99.  
108 Based on similarity principles of 97% sequences between reads, OTUs coverage of  
109 sequences was adequate. As showed Fig 2, the rarefaction curve of 16S rRNA gene had  
110 trends to smooth, which showed sequences were reasonable. The span of rank abundance  
111 of 16S rRNA gene in the horizontal direction had trends to increase, which showed the  
112 abundance of species had trend to increase, and the span of rank abundance of 16S rRNA  
113 gene in the vertical direction had trends to smooth, which showed the distribution of  
114 species had trend to even. In a word, the sequences could reflect accurately the rumen  
115 microbial composition for lambs.

116 Except for OTUs of PS had trend to higher than them of TS for pre-weaning lambs  
117 ( $P = 0.066$ ), the physical form of starter feed did not affect the alpha diversities of rumen  
118 bacterial communities for pre-weaning and post-weaning lambs ( $P > 0.05$ , Table 2).

119 **Beta diversities of rumen microbe.** Principal co-ordinates analysis (PCoA) of rumen  
120 bacterial OTUs showed contribution rates of PC1 and PC2 to differences among samples  
121 were 21.80% and 19.69% respectively, which could reflect adequately the differences  
122 among samples. PCoA results showed differences of samples were minute in same  
123 groups (Fig 3). Non-metric multi-dimensional scaling analysis (NMDS) of rumen  
124 bacterial OTUs (Fig 4) showed stress value lower 0.2 (0.133), which could indicate  
125 accurately the data and reflect the significant differences of rumen microbial structure and  
126 diversity ( $P < 0.05$ ).

127 **Effects of starter feeds of different physical forms on rumen microbe.** Among the  
128 Phylum of top 10, the predominant Phylum was all *Bacteroidetes* and *Firmicutes* in every  
129 group, and their relative abundances were all higher than 24% (Fig 5). Only the relative  
130 abundances of *Bacteroidetes* of TS had trends to higher than them of PS for pre-weaning  
131 lambs ( $P=0.084$ ). However, with intake of starter feed, the relative abundances of  
132 *Bacteroidetes* increased, and the relative abundances of *Firmicutes* decreased. The  
133 relative abundances of *Bacteroidetes* (61.96%) of TS had exceed them of *Firmicutes*  
134 (32.08%) and *Proteobacteria* (3.99%) for pre-weaning lambs, and become the first  
135 predominant Phylum, which were similar to them *Bacteroidetes* (65.36%) of TS for  
136 post-weaning lambs. But the relative abundances of *Bacteroidetes* (57.28%) of PS  
137 exceeded them of *Firmicutes* (31.21%) and *Proteobacteria* (1.15%) for post-weaning  
138 lambs, which were still lower than them of *Bacteroidetes* of TS for pre-weaning (61.96%)  
139 and post-weaning (65.36%) lambs.

140 It showed 153 rumen microflora were detected at the genus level between TS and PS  
141 for pre-weaning lambs, and the relative abundances of 13 rumen microflora were higher  
142 than 0.5%. The predominant microflora of PS and TS commonly were  
143 *unidentified\_Prevotellaceae* (6.49% and 21.85%). The predominant microflora of PS  
144 peculiarly was *Lactobacillus* (14.53%), *Succinivibrio* (10.82%) and  
145 *unidentified\_Cyanobacteria* (6.96%), and the predominant microflora of TS peculiarly  
146 was *Sharpea* (4.41%), *Dialister* (3.85%) and *Succinivibrio* (3.18%). The results of rumen  
147 microbe showed the PS increased significantly *unidentified\_Clostridiales*, *Lactpoccus*,

148 *Sarcina*, *unidentified\_Cyanobacteria*, and TS increased significantly *sharpea* and  
149 *Oribacterium* compared between PS and TS for pre-weaning lambs at the genus level  
150 (Fig 6, LDA>4).

151 However, the effects of starter feed of two physical forms on rumen microflora were  
152 different for post-weaning lambs. And 139 rumen microflora were detected at the genus  
153 level between TS and PS for post-weaning lambs, and the relative abundances of 13  
154 rumen microflora were higher than 0.5%. The predominant microflora of PS and TS  
155 commonly were *unidentified\_Prevotellaceae* (29.57% and 38.49%). The predominant  
156 microflora of PS peculiarly was *Dialister* (7.23%), *unidentified\_Lachnospiraceae*  
157 (6.72%), and the predominant microflora of TS peculiarly were *Sharpea* (7.43%) and  
158 *Succinivibrio* (6.87%). The results of rumen microbe showed only the TS increased  
159 significantly *sharpea* compared between PS and TS for post-weaned lambs at the genus  
160 level (Fig 7, LDA>4).

161 **Functional prediction of rumen microbe.** Functional profiles (KEGG level 2 pathways)  
162 of the two groups for pre-weaning and post-weaning lambs were all found to be similar in  
163 comparison (Fig 8). And the main functions of rumen microbe (the top seven) for lambs  
164 were replication and repair (pre-weaning: PS 10.56%, TS 11.03%; post-weaning: PS  
165 11.44%, TS 11.39%), carbohydrate metabolism (pre-weaning: PS 11.04%, TS 10.95%;  
166 post-weaning: PS 10.73%, TS 10.72%), translation (pre-weaning: PS 9.86%, TS 10.33%;  
167 post-weaning: PS 10.65%, TS 10.67%), membrane transport (pre-weaning: PS 10.15%,  
168 TS 8.57%; post-weaning: PS 8.36%, TS 8.29%), amino acid metabolism (pre-weaning:



169 PS 8.35%, TS 8.31%; post-weaning: PS 8.16%, TS 8.22%), nucleotide metabolism  
170 (pre-weaning: PS 4.66%, TS 4.84%; post-weaning: PS 5.00%, TS 4.99%), energy  
171 metabolism (pre-weaning: PS 4.26%, TS 4.55%; post-weaning: PS 4.60%, TS 4.65%).  
172 Only the “Transporters” and “Fatty acid degradation” predicted function of KEGG level 3  
173 pathways of PS were increased significantly and “Amino acid related enzymes” was  
174 decreased significantly for pre-weaning lambs compared to those of TS ( $P < 0.05$ , Fig 9).  
175 And the predicted function of KEGG level 3 pathways between PS and TS for  
176 post-weaning lambs still had no significant differences ( $P > 0.05$ ).

## 177 **DISCUSSION**

178 Rumen pH was the most intuitive indicators reflected the fermentative condition of  
179 rumen, which could integrated reflect the rumen microbe, production, absorption and  
180 neutralization of organic acid. Furthermore, the acidity of rumen played a dominant role  
181 to maintain ruminal environment. Many factors affected the rumen pH, such as diet  
182 structure, secretion volume of saliva, speed of intake, VFA in rumen and the rates of  
183 production, absorption and excretion of organic acids. But the fundamental reasons of  
184 fluctuation of rumen pH were the diet structures and nutrition levels. Murphy and  
185 Kennelly indicated that rumen pH changed regularly from 5.0 to 7.5, which resulted from  
186 diet nature and time after intake (15). When intake fermentable carbohydrate, a lot of  
187 VFA could be produced that led to decrease of pH in rumen. In experiment, rumen pH  
188 changed from 5.14 to 5.96, which were in normal scope. However, rumen pH of TS was  
189 lower than them of PS respectively for pre-weaned and post-weaned lambs. The possible

190 reasons were TS contained steam-flaked corn, which included a lot of fermentable  
191 carbohydrate and reduced rumen pH. Nejad et al. showed steam-flaked corn increased the  
192 gelatinization of corn starch so as to change the degradation form of corn in rumen  
193 microbe, increase the surface area of corn and enhance hydrolytic ability of rumen  
194 microbe and enzyme to starch granule (16). Hence, TS increased fermentable  
195 carbohydrate utilized by rumen microbe, which produced a lot of VFA and reduced the  
196 rumen pH.

197 VFA were main products fermented by carbohydrates in rumen, included the acetate,  
198 propionate and butyrate, which were important energy sources of ruminant. Research  
199 found VFA were important promoting factors to growth and development of rumen  
200 epithelium. Furthermore, among VFA, stimulant action of butyrate was the most effective,  
201 following as propionate and acetate (17). In experiment, concentration of total VFA,  
202 propionate and butyrate of TS were all higher significantly than them of PS for  
203 pre-weaned and post-weaned lambs, which showed TS were better benefits to  
204 fermentation and development of rumen. These were consistent with the results of  
205 research about calves. Lesmeister et al. reported concentrations of VFA and propionate of  
206 TS contained steam flaking corn were higher than them of starter feed contained the  
207 whole corn, dry-rolled corn and roasted-rolled corn in serum of calve (18). Pavlata et al.  
208 also found concentrations of VFA, acetate and propionate of TS with chopped straw were  
209 higher significantly than them of PS (19). These results indicated that texture starter feed  
210 contained steam flaking corn could provide more chemical stimulations to development

211 of rumen, which were better benefits to fermentation and development of rumen for  
212 lambs. These were consistent with results of rumen development in experiment.

213  $\text{NH}_3\text{-N}$  was degradation products of protein nitrogen, non-protein nitrogen of diet  
214 and endogenous nitrogen in rumen, which were essential precursors to synthesize  
215 bacterial protein of rumen microbe. Maintaining reasonable  $\text{NH}_3\text{-N}$  concentration was an  
216 important condition to growth and reproduction of rumen microbe.  $\text{NH}_3\text{-N}$  concentration  
217 not only could reflect the speed of production and utilization, which degraded from  
218 nitrogenous substances by rumen microbe, but also could reflect the balances between  
219 degradation and synthesis of protein under specific diets to the extent. Many factors could  
220 affect the  $\text{NH}_3\text{-N}$  concentration in rumen, such as protein quality of diets, emptying rate  
221 of chyme and absorption of rumen wall (20). It was reported that 5 mg/100ml  $\text{NH}_3\text{-N}$   
222 concentration was the lowest concentration which maintained growth and protein  
223 synthesis of rumen microbe. When  $\text{NH}_3\text{-N}$  concentration was lower than 5 mg/100ml, the  
224 growth of rumen microbe would be suppressed. Moreover, the optimum  $\text{NH}_3\text{-N}$   
225 concentration which maintained growth of rumen microbe was 6.3-27.5mg/100ml (21).  
226 In current experiment, the starter feed of two different physical forms did not affect the  
227  $\text{NH}_3\text{-N}$  concentration of rumen for pre-weaning and post-weaning lambs, but the  $\text{NH}_3\text{-N}$   
228 concentration of rumen were under the optimum scopes maintained growth of rumen  
229 microbe. Beharka et al. and Pazoki et al. found that the  $\text{NH}_3\text{-N}$  concentration in rumen  
230 liquid of calves had no significant differences between pelleted and textured starter feed  
231 (22, 23). Additionally, Qi and Ga et al. also found that the corn processed by pelletizing,

232 baking and steaming did not affect significantly the NH<sub>3</sub>-N concentration in rumen liquid  
233 of sheep (24, 25).

234 OTU could reflect the clustering quantities, and alpha diversities were used to  
235 evaluate the abundances and diversities of rumen microbe. Among alpha diversities,  
236 chao1 and Ace reflected the abundances of rumen microbe, whose higher chao1 and Ace  
237 indicated abundances of flora were greater; shannon and simpson reflected the diversities  
238 of rumen microbe, whose greater shannon and lower simpson showed diversities of flora  
239 were more (26). In experiment, OTU, chao1, ACE, shannon and simpson of rumen  
240 microbe all had no significant differences between two starter feed of different physical  
241 forms for pre-weaned and post-weaned lambs, only OTU of rumen microbe of TS had  
242 trends to lower than that of PS for pre-weaned lambs. These showed physical forms of  
243 starter did not affect the species, abundances and diversities of rumen microbe for  
244 pre-weaning and post-weaning lambs, only the species of rumen microbe of TS had  
245 trends to lower than that of PS for pre-weaning lambs. The results showed the lambs were  
246 easier to adopt the TS during courses of transition from liquid to solid starter feed, and  
247 could urge rumen of lambs to establish dominant flora and disappear instantaneous flora.

248 Intake of starter feed early could change rumen flora for pre-weaning lambs (27).  
249 With increasing of ages and intake of starter feed for lambs, *Bacteroidetes*, *Firmicutes*  
250 and *Proteobacteria* could become the main dominant flora of higher relative abundances,  
251 and the relative abundances of *Bacteroidetes* were increased, and the relative abundances  
252 of *Firmicutes* and *Proteobacteria* were reduced (2). When calves intake MR and starter

253 feed, the *Proteobacteria* of rumen could be replaced by *Bacteroidetes* at ages of 42d, and  
254 the relative abundances of *Bacteroidetes* become the highest, which were possible to be  
255 related to chemical composition of diets (12). In experiment, the *Firmicutes* and  
256 *Proteobacteria* of TS had been replaced by *Bacteroidetes* for pre-weaning lambs, and  
257 *Bacteroidetes* had become the first predominant Phylum, and achieve similar relative  
258 abundances to them of TS for post-weaning lambs (pre-weaning, 61.96%; post-weaning,  
259 65.36%). However, the *Firmicutes* and *Proteobacteria* of PS were replaced by  
260 *Bacteroidetes* for post-weaning lambs, and *Bacteroidetes* become the first predominant  
261 Phylum. Furthermore, relative abundances of *Bacteroidetes* of PS (57.28%) for  
262 post-weaning lambs were still lower than them of TS for pre-weaning (61.96%) and  
263 post-weaning (65.36%) lambs. The results showed the lambs were easier to adopt the TS  
264 during courses of transition from liquid to solid starter feed, and could urge rumen of  
265 lambs to establish dominant flora.

266 Among the rumen microflora of ruminants, *Bacteroidetes* and *Firmicutes* were two  
267 main dominant floras (28). It was well known that rumen microbe, especially  
268 *Bacteroidetes*, played an important role in degradation of starch and protein of diets,  
269 synthesizes of protein of rumen microbe, absorption of peptides and amino acids (29).  
270 And *Firmicutes* contained many bacterial degraded fibres, such as *Ruminococciis*,  
271 *Eubacterium*, *Pseudobutyrvibrio*, *Butyvvibro* and *Oscillibacter*, whose main function  
272 were to degrad the cellulose (30). These showed *Bacteroidetes* was better benefits to  
273 degrade the concentrated diets, and *Firmicutes* was better benefits to degrade the

274 roughage diets. Jiang et al. found the relative abundances of *Bacteroidetes* of fermented  
275 corn gluten meal were significant higher than them of corn gluten meal, and relative  
276 abundances of *Firmicutes* of fermented corn gluten meal were significant lower than  
277 them of corn gluten meal (31). In experiment, compared to PS, TS increased the relative  
278 abundances of *Bacteroidetes* for pre-weaning (PS, 35.74%; TS, 61.96%) and  
279 post-weaning (PS, 57.28%; TS, 65.36%) lambs, decreased the relative abundances of  
280 *Firmicutes* for pre-weaning (PS, 37.88%; TS, 32.08%) and post-weaning (PS, 31.21%;  
281 TS, 24.03%) lambs. These results were consistent with previous research. These results  
282 indicated physical forms of starter feeds affected the structures of rumen microbe at  
283 levels of phylum for pre-weaning and post-weaning lamb, and TS was better benefits to  
284 promote the fermentation of rumen and absorption of nutrients for lambs. The possible  
285 reasons were corns of TS processed by steam flaking, and improved the gelatinization of  
286 starch, contained more fermentable carbohydrates, which were better benefits to  
287 fermentation of *Bacteroidetes*. These were also consistent with results of fermentative  
288 parameters of rumen.

289 However, Kim et al. found the dominant flora in rumen was *Firmicutes* and  
290 *Bacteroidetes* in turn (32, 33). The reasons of differences might be related to composition  
291 of diets. Their diets were type of roughage, and the diets were type of concentration in  
292 current experiment. Additionally, the research also found when fed diets of higher  
293 proportional concentration, the dominant flora in rumen were *Bacteroidetes*; and when  
294 fed diets of higher proportional roughage, the dominant flora in rumen were *Firmicutes*

295 (34). And *Bacteroidetes* were correlated negatively to *Firmicutes* (35). These proved  
296 further TS were better effective to fermentation of rumen for pre-weaning and  
297 post-weaning lambs.

298 The main fermented products of *sharpea* in rumen of sheep were lactates, and  
299 formation of lactates promoted further fermentation of *sharpea*, urged lactates to change  
300 into butyrate, which led to produce lower H<sub>2</sub> compared to traditional fermentation  
301 directly from carbohydrate to butyrate and reduced production of CH<sub>4</sub> in rumen (36, 37).  
302 In current experiment, compared to PS, TS increased significantly the relative  
303 abundances of *sharpea* of rumen for pre-weaning and post-weaning lambs, which were  
304 consistent with significant higher concentration of butyrate of TS in rumen liquid. These  
305 results showed TS contained steam flaking corn were benefits to improve rumen  
306 microflora, urge rumen fermentation for lambs. At same time, Xue et al. also found  
307 concentrations of butyrate in rumen liquid were correlated positively to the relative  
308 abundances of *sharpea* when they compared effects of higher yield, higher concentrations  
309 of milk protein and lower yield, lower concentrations of milk protein on rumen  
310 microflora of calves (38). Lin et al. also proved when fed starter feed, *Sharpea* produced  
311 lactates was main enriched in rumen of lambs (39).

312 Additionally, we found PS also increased significantly the relative abundances of  
313 *unidentified\_Clostridiales*, *Lactpcoccus*, *Lactobacillus*, *Sarcina* and  
314 *unidentified\_Cyanobacteria* for pre-weaning lambs compared TS in the experiment.  
315 *Clostridiales* and *Lactpcoccus* were all the main representative genus of *Firmicutes*,

316 which could degrade cellulose in rumen. Hence, the higher relative abundances of  
317 *Clostridiales* and *Lactpcoccus* of PS were consistent with higher relative abundances of  
318 *Firmicutes* of PS (PS, 37.88%; TS, 32.08%) at levels of phylum for pre-weaning lambs.  
319 *Lactobacillus* could ferment carbohydrates to produce lactates, which were benefits to  
320 health of animals. Hence, *Clostridiales*, *Lactpcoccus* and *Lactobacillus* played decisive  
321 roles in digestion and absorption of nutrients in gastrointestinal tract and immunities of  
322 animals. *Cyanobacteria* were one of microalgae, which could improve the performances  
323 of animals and qualities of meat as feed additives (40). *Sarcina* was related to rumen  
324 bloating of lambs (41) and calves (42), which should not exist in digestive tracts of  
325 animals.

326       However, predicted functions of rumen were found to be similar in two groups for  
327 pre-weaning and post-weaning lambs in current experiment. Only the “Transporters” and  
328 “Fatty acid degradation” of PS were increased significantly and “Amino acid related  
329 enzymes” was decreased significantly for pre-weaning lambs compared to those of TS. It  
330 was confirmed previously that significant changes of microbial composition might not  
331 lead to a shift of function because many microbes shared the same metabolic pathways.  
332 Li et al. found that all of the functional classes between two age groups (d14 and d42 of  
333 calves) were similar, suggesting that although their phylogenetic composition greatly  
334 fluctuated, the rumen microbial communities of pre-ruminant calves maintained a stable  
335 function and metabolic potentials (12). These might be the reasons that two group lambs  
336 had similar functions in this experiment. Maybe it was necessary to analyse the rumen



337 microbiome functions using metagenomic and/or metabolomics technologies for  
338 completed and integrated understand the impact of rumen function further.

339 In a word, physical forms of starter feeds affected the fermentation and microbial  
340 composition of rumen for pre-weaning and post-weaning lambs. TS were better benefits  
341 to improve fermentation environment and establish dominant flora of rumen early, which  
342 were in favour of growth and development of rumen for pre-weaned and post-weaning  
343 lambs.

#### 344 **MATERIALS AND METHODS**

345 **Animals, feeds and experimental design.** This experiment was carried out on a local  
346 sheep farm (Baiyin Kangrui breeding sheep co., Baiyin, Gansu province). All the  
347 experimental protocols performed in this study were approved by the Animal Care  
348 Committee of Gansu Agricultural University and the experimental procedures used in this  
349 study were in accordance with the recommendations of the University's guidelines for  
350 animal research. In this study, twenty-four healthy male Hu lambs, whose average body  
351 weight were  $5.04 \pm 0.75$  kg, were separated from their dams at day 8 and moved into a  
352 naturally ventilated barn with individual cages ( $0.8 \times 1.3$  m). And the trial lambs were fed  
353 either milk replacer (MR) and pelleted starter feed (PS, with a mean particle size of six  
354 mm diameter), or MR and textured starter feed (TS, which included coarse mashed  
355 steam-flaked corn, also with a mean particle size of six mm diameter) in pre-weaning  
356 (day 8 to 35) and post-weaning (day 36 to 42) lambs. And the MR (23% CP and 12% fat,  
357 DM basis) was fed by single bottles to lambs at 2% of body weight at day 8 divided as

358 three equal amounts at 08:00, 14:00 and 20:00 in pre-weaning. After weaning, all lambs  
359 continued to be fed starter according to their trial group. And all lambs had free access to  
360 readily avail clean fresh water and their respective ad lib starter feed in the whole  
361 experiment. The diets (Table 3) were prepared by Gansu Aonong Feed Co., Ltd according  
362 to National Research Council recommendations (NRC, 2007). The MR was bought from  
363 Beijing Accurate Animal Nutrition Research Center.

364 **Sample collection.** Lambs for each treatment were euthanized by captive bolt stunning  
365 and exsanguinated in a specialized room of the experimental farm without any  
366 transportation at the age of 21 or 42 days. After slaughter, a part of rumen content was  
367 used to collect rumen liquid by immediately filtering through four layers of swab and  
368 transferring into 10 cm centrifuge tubes, and then stored at  $-20^{\circ}\text{C}$  to analyse the total  
369 volatile fatty acids (VFAs) and ammonia nitrogen ( $\text{NH}_3\text{-N}$ ); the other part of rumen  
370 content was collected for storage at  $-80^{\circ}\text{C}$  for rumen bacteria analysis.

371 **Determination of rumen fermentative parameters.** After slaughter, the rumen content  
372 was mixed and determined pH immediately by PB-10 acidity meter (Zedorius, Kogentin,  
373 Germany). Rumen liquid were thawed and analyzed for individual and total VFA  
374 concentrations by gas chromatography (AI 3000, Thermo, Germany) (43) and  $\text{NH}_3\text{-N}$  by  
375 colorimetric method (44) using visible spectrophotometer (Shanghai Jinghua Technology  
376 Co. Ltd). Details of VFA determination were as follows:

377 0.6  $\mu\text{L}$  rumen liquid samples were injected by an auto sampler into an AE-FFAP  
378 ( $30\text{m} \times 0.25\text{mm} \times 0.33 \mu\text{m}$ ; Zhongke Antai, Lanzhou, China) . Chromatographic

379 conditions: temperature of injection entrance 200°C; N<sub>2</sub> flow 2.0 mL•min<sup>-1</sup>; split ratio  
380 40:1; procedure heating mode (120°C 3 min, 10°C•min<sup>-1</sup> to 180°C, kept 1 min); detector  
381 temperature 250°C; FID air, H<sub>2</sub> and N<sub>2</sub> flow were 450 mL•min<sup>-1</sup>, 40 mL•min<sup>-1</sup> and 45  
382 mL•min<sup>-1</sup> respectively; cylinder heating procedure: from 45°C to 150°C as speed 20°C•  
383 min<sup>-1</sup>, and kept 5min. Finally, the peak integration was performed using Chromeleon®  
384 Software.

385 **Total DNA extraction of rumen microbe, illumina sequencing.** Rumen content was  
386 sent to Novogene Bioinformatics Technology Co., Ltd. (Beijing, China) to extract DNA  
387 and sequence of rumen microbe. Details were following:

388 Total DNA of rumen microbe in rumen content was extracted by  
389 thecetyltrimethylammonium bromide method (45) with a bead-beater (Biospec Products;  
390 Bartlesville, OK, United States) as described by Gagen et al. (46). The amplification of  
391 V<sub>3</sub>-V<sub>4</sub> hypervariable region of the 16S rRNA gene was carried out with formwork of  
392 each of the DNA samples using the primer set 515F/806R and Phusion® High-Fidelity  
393 PCR Master Mix (New England Biolabs, Ipswich, MA, United States) as described by  
394 Caporaso et al. (47). When each forward and reverse primer had a 6-bp error-correcting  
395 barcode at the 5' terminus, it was seen as unique to each DNA sample. The sequencing  
396 for all samples was on an Illumina HiSeq platform by Novogene Bioinformatics  
397 Technology Co., Ltd. (Beijing, China) to generate 2 × 250 bp paired end reads.

398 After the paired-end reads were cut off barcode and primer, they were joined  
399 together and formed single sequences using FLASH based on overlapping regions (48).

400 Sequences with a quality score of <20 and a length of >300 bp or <200 bp were filtered  
401 and discarded using Quantitative Insight into Microbial Ecology (QIIME, 49). At same  
402 time, the possible chimeric sequences were also identified and removed from the  
403 sequences using the usearch61 algorithm in USEARCH 6.1 (50). Operational taxonomic  
404 units (OTUs) were clustered as 97% similarity, and chosen the representative sequence  
405 according to the algorithmic principle and annotation analysed in SILVA SSU rRNA  
406 database (51) used Uparse (Uparse v7.0.1001, 52) by Mothur method (53).

407 **Microbial functional prediction.** Microbial function predicted byTax4Fun based on 16S  
408 Silva database (54). Details were as following:

409 All the genes 16S rRNA sequences of prokaryote in Kyoto Encyclopedia Genes and  
410 Genomes (KEGG) database were extracted, then compared in SILVA SSU Ref NR  
411 database(BLAST bitscore >1500)by BLASTN method and established correlation matrix.  
412 Finally, functional information of all the genes 16S rRNA sequences of prokaryote  
413 annotated in KEGG database were compared with functional information in SILVA  
414 database by UProC and PAUDA so as to achieve the goals of microbial functional  
415 prediction.

416 **Statistical analyses.** Data for rumen fermentative and metabolic parameters, alpha  
417 diversity indices (number of OTU, ACE, Chao1, Shannon and Simpson index) of rumen  
418 microbe were pooled at each time point for the six slaughtered lambs in each group. Data  
419 were analysed as independent sample t-tests (SPSS 20.0, Inc., Chicago, IL, USA).  
420 Significance was designated as  $P<0.05$  with a trend being between  $P\geq 0.05$  and  $P<0.10$ .

421 Beta diversity of rumen microbe was analysed by T-test and wilcox-test. Analysis of  
422 similarity between groups was calculated by Bray-Curtis. Principal co-ordinates analysis  
423 (PCoA) of rumen bacterial OTUs calculated the distance by Bray-Curtis firstly, then  
424 drawn the fig by R software (v3.3.0). Difference between groups was analysed by LEfSe  
425 (LDA Effect Size), and  $LDA > 4$  was different marking of statistics and biology (55).

## 426 **ACKNOWLEDGMENTS**

427 This work was supported by National Natural Science Foundation of China  
428 (31860654). The authors express their kind appreciation to Dr. Xiaojuan Wang and  
429 Ligang Yuan from the Gansu Agricultural University for their assistance throughout the  
430 experiments.

## 431 **REFERENCES**

- 432 1. Bi YL, Zeng SQ, Zhang R, Diao QY, Tu Y. 2018. Effects of dietary energy levels on  
433 rumen bacterial community composition in Holstein heifers under the same forage to  
434 concentrate ratio condition. *BMC Microbiol* 18: 69.
- 435 2. Jami E, Israel A, Kotser A, Mizrahi I. 2013. Exploring the bovine rumen bacterial  
436 community from birth to adulthood. *ISME J* 7: 1069-1079.
- 437 3. Khan MA, Weary DM, von Keyserlingk MAG. 2011. Invited review: Effects of milk  
438 ration on solid feed intake, weaning, and performance in dairy heifers. *J Dairy Sci* 94:  
439 1071-1081.
- 440 4. Huntington GB. 1997. Starch utilization by ruminants: From basics to the bunk. *J*  
441 *Anim Sci* 75: 852-867.

- 442 5. Owens WE, Ray CH, Watts JL, Yancey RJ. 1997. Comparison of success of antibiotic  
443 therapy during lactation and results of antimicrobial susceptibility tests for bovine  
444 mastitis. *J Dairy Sci* 80:313-317.
- 445 6. Laarman AH, Ruiz-Sanchez AL, Sugino T, Guan LL, Oba M. 2012. Effects of feeding  
446 a calf starter on molecular adaptations in the ruminal epithelium and liver of Holstein  
447 dairy calves. *J Dairy Sci* 95: 2585-2594.
- 448 7. Laarman AH, Oba M. 2011. Short communication: Effect of calf starter on rumen pH  
449 of Holstein dairy calves at weaning. *J Dairy Sci* 94: 5661-5664.
- 450 8. Suarez-Mena FX, Heinrichs AJ, Jones CM, Hill TM, Quigley JD. 2015. Digestive  
451 development in neonatal dairy calves with either whole or ground oats in the calf  
452 starter 1. *J Dairy Sci* 98: 3417-3431.
- 453 9. Baldwin RL, McLeod KR, Klotz JL, Heitmann RN. 2004. Rumen development,  
454 intestinal growth and hepatic metabolism in the pre and postweaning ruminant. *J*  
455 *Dairy Sci* 87: E55-E65.
- 456 10. Mirzaei M, Khorvash M, Ghorbani GR, Kazemi-Bonchenari M, Riasi A, Nabipour A,  
457 Borne JJGvd. 2015. Effects of supplementation level and particle size of alfalfa hay  
458 on growth characteristics and rumen development in dairy calves. *J Anim Physiol*  
459 *Anim Nutr* 99: 553-564.
- 460 11. Dockalova H, Stastnik O, Krivova S, Sedlakova L, Pavlata L. 2016. Effect of  
461 different physical forms of starter on feed intake and performance of calves. *Mendel*  
462 *Net* 23: 201-204.

- 463 12. Li RW, Connor EE, Li C, Baldwin VI, Ransom L, Sparks ME. 2012. Characterization  
464 of the rumen microbiota of pre-ruminant calves using metagenomic tools. *Environ*  
465 *Microbiol* 14: 129-139.
- 466 13. Chen Y, Penner GB, Li M, Oba M, Guan LL. 2011. Changes in bacterial diversity  
467 associated with epithelial tissue in the beef cow rumen during the transition to a  
468 high-grain diet. *Appl Environ Microbiol* 77: 5770-5781.
- 469 14. Jiao J, Huang J, Zhou C, Tan Z. 2015. Taxonomic identification of ruminal epithelial  
470 bacterial diversity during rumen development in goats. *Appl Environ Microbiol* 81:  
471 3502-3509.
- 472 15. Murphy JJ, Kennelly JJ. 1987. Effect of protein concentrate and protein source on the  
473 degradability of dry matter and protein in situ. *J Dairy Sci* 70: 1841-1849.
- 474 16. Nejad Ghassemi J, Torbatinejad N, Naserian AA. 2012. Effects of processing of  
475 starter diets on performance, nutrient digestibility, rumen biochemical parameters and  
476 body measurements of Brown Swiss dairy calves. *Asian-Australas. J Anim Sci* 25:  
477 980-987.
- 478 17. Tamate H, McGilliard AD, Jacobson NL, Getty R. 1962. Effect of various dietaries on  
479 the anatomical development of the stomach in the calf. *J Dairy Sci* 45: 408-420.
- 480 18. Lesmeister KE, Heinrichs AJ. 2004. Effects of corn processing on growth  
481 characteristics, rumen development, and rumen parameters in neonatal dairy calves. *J*  
482 *Dairy Sci* 87: 3439-3450.
- 483 19. Pavlata L, Sťastnik O, Křivova S, Dockalova H, Sedlakova L, Mrkvicova E, Doležal

- 484 P. 2017. The effect of different physical forms of starter feed on rumen fermentation  
485 indicators and weight gain in calves after weaning. *Acta Vet Brno* 86: 285-291.
- 486 20. Hristov AN, Ropp JK, Hunt CW. 2002. Effect of barley and its amylopectin content  
487 on ruminal fermentation and bacterial utilization of ammonia-N in vitro. *Anim Feed*  
488 *Sci Tech* 99: 25-36.
- 489 21. Ortega ME, Stem MD, Satter LD. 1979. The effect of rumen ammonia concentrate  
490 on dry matter disappearance in situ. *J Dairy Sci* 62: 76 (Abstr).
- 491 22. Beharka AA, Nagaraja TG, Morrill JL, Kennedy GA, Klemm RD. 1998. Effects of  
492 form of the diet on anatomical, microbial, and fermentative development of the rumen  
493 of neonatal calves. *J Dairy Sci* 81: 1946-1955.
- 494 23. Pazoki A, Ghorbani GR, Kargar S, Sadeghi-Sefidmazgi A, Ghaffari MH, Drackley JK.  
495 2017. Growth performance, nutrient digestibility, ruminal fermentation, and rumen  
496 development of calves during transition from liquid to solid feed: Effects of physical  
497 form of starter feed and forage provision. *Anim Feed Sci Tech* 234: 173-185.
- 498 24. Qi ZL. 2001. Effects of processed corns on rumen fermentation, nutrient digestion  
499 and metabolism in sheep. Academic dissertation of master degrees in Inner Mongolia  
500 Agricultural University, Hohhot, China.
- 501 25. Ga ED, ZL, Zhang RH, Chen HJ, Zhao FR. 2002. Effects of different processed corns  
502 on pH, NH<sub>3</sub>-N and VFA in rumen liquid of sheep. *Heilongjiang journal of animal*  
503 *science and veterinary medicine* 9: 18-20.
- 504 26. Zeng Y, Gao YH, Peng ZL, Chen SY, Xie XT, Miao JJ, Bai X, Guo CH. 2020. Effects



- 505 of yeast culture supplementation in diets on rumen fermentation parameters and  
506 microflora of housed-feeding yak. Chinese journal of animal nutrition 32: 1721-1733.
- 507 27. Wang W, Li C, Li F, Wang X, Zhang X, Liu T, Nian F, Yue X, Li F, Pan X, La Y, Mo F,  
508 Wang F, Li B. 2016. Effects of early feeding on the host rumen transcriptome and  
509 bacterial diversity in lambs. Sci Rep 6: 3247-3249.
- 510 28. Singh KM, Jakhesara SJ, Koringa PG, Rank DN, Joshi CG. 2012. Metagenomic  
511 analysis of virulence-associated and antibiotic resistance genes of microbes in rumen  
512 of Indian buffalo (*Bubalus bubalis*). Gene 507: 146-151.
- 513 29. Castillo-Lopez E, Moats J, Aluthge ND, Ramirez Ramirez HA, Christensen DA,  
514 Mutsvangwa T, Fernando SC. 2018. Effect of partially replacing a barley-based  
515 concentrate with flaxseed-based products on the rumen bacterial population of  
516 lactating Holstein dairy cows. J Appl Microbiol 124: 42-57.
- 517 30. Evans NJ, Brown JM, Murray RD, Getty B, Birtles RJ, Hart CA, Carter SD. 2011.  
518 Characterization of novel bovine gastrointestinal tract *Treponema* isolates and  
519 comparison with bovine digital dermatitis treponemes. Appl Environ Microbiol 77:  
520 138-147.
- 521 31. Jiang X, Ma GM, Cui ZQ, Li Y, Zhang YG. 2020. Effects of fermented corn gluten  
522 meal on growth performance, plasma metabolites, rumen fermentation and bacterial  
523 community of Holstein calves during the pre-weaning period. Livest Sci 231: 103866.
- 524 32. Kim M, Morrison M, Yu ZT. 2011. Phylogenetic diversity of bacterial communities in  
525 bovine rumen as affected by diets and microenvironments. Folia Microbiol 56:

- 526 453-458.
- 527 33. Kim M, Felix TL, Loerch SC, Yu ZT. 2014. Effect of Haylage and Monensin  
528 Supplementation on Ruminal Bacterial Communities of Feedlot Cattle. *Curr.*  
529 *Microbiol* 69: 169-175.
- 530 34. Fernando SC, Purvis HT, Najjar FZ, Sukharnikov LO, Krehbiel CR, Nagaraja TG,  
531 Roe BA, Desilva U. 2010. Rumen microbial population dynamics during adaptation  
532 to a high-grain diet. *Appl Environ Microbiol* 76: 7482-7490.
- 533 35. Rice WC, Galyean ML, Cox SB, Dowd SE, Cole NA. 2012. Influence of wet  
534 distillers grains diets on beef cattle fecal bacterial community structure. *BMC*  
535 *Microbiol* 12: 25.
- 536 36. Kamke J, Kittelmann S, Soni P, Li Y, Tavendale MH, Ganesh S, Janssen PH, Shi WB,  
537 Froula J, Rubin EM, Attwood GT. 2016. Rumen metagenome and metatranscriptome  
538 analyses of low methane yield sheep reveals a *Sharpea*-enriched microbiome  
539 characterised by lactic acid formation and utilisation. *Microbiome* 4: 56.
- 540 37. Kumar S, Treloar BP, The KH, Mckenzie CM, Henderson G, Attwood GT, Waters SM,  
541 Patchett ML, Janssen PH. 2018. *Sharpea* and *Kandleria* are lactic acid producing  
542 rumen bacteria that do not change their fermentation products when co-cultured with  
543 a methanogen. *Anaerobe* 54: 31-38.
- 544 38. Xue MY, Sun HZ, Wu XH, Guan LL, Liu JX. 2019. Assessment of rumen bacteria in  
545 dairy cows with varied milk protein yield. *J Dairy Sci* 102: 5031-5041.
- 546 39. Lin LM, Xie F, Sun DM, Liu JH, Zhu WY, Mao SY. 2019. Ruminal microbiome-host

- 547 crosstalk stimulates the development of the ruminal epithelium in a lamb model.  
548 *Microbiome* 7:1-16.
- 549 40. Madeira MS, Cardoso C, Lopes P., Coelho D, Afonso C, Bandarra NM, Prates JAM.  
550 2017. Microalgae as feed ingredients for livestock production and meat quality: A  
551 review. *Livest Sci* 205: 111-121.
- 552 41. Vatn S, Gunnes G, Nybo, K, Juul HM. 2000. Possible involvement of *Sarcina*  
553 *ventriculi* in canine and equine acute gastric dilation. *Acta Vet Scand* 41: 333-337.
- 554 42. Edwards GT, Woodger NG, Barlow AM, Bell SJ, Harwood DG, Otter A, Wight AR.  
555 2008. *Sarcina*-like bacteria associated with bloat in young lambs and calves. *Vet. Rec*  
556 163: 391-393.
- 557 43. Isac M, García M, Aguilera J, Alcaide EM. 1994. A comparative study of nutrient  
558 digestibility, kinetics of digestion and passage and rumen fermentation pattern in  
559 goats and sheep offered medium quality forages at the maintenance level of feeding.  
560 *Arch Anim Nutr* 46: 37-50.
- 561 44. Feng ZC, Gao M. 2010. An improved method for determination of ammonia nitrogen  
562 in rumen liquid by colorimetry. *Animal Husbandry and Feed Science* 31: 37.
- 563 45. Brookman JL, Nicholson MJ. 2005. “Anaerobic fungal populations,” in *Methods in*  
564 *Gut Microbial Ecology for Ruminants*, eds Makkar HPS, McSweeney CS. 139-150.  
565 Springer, Berlin.
- 566 46. Gagen EJ, Denman SE, Padmanabha J, Zadbuke S, Al Jassim R, Morrison M,  
567 McSweeney CS. 2010. Functional gene analysis suggests different acetogen

- 568 populations in the bovine rumen and tammar wallaby forestomach. *Appl Environ*  
569 *Microbiol* 76: 7785-7795.
- 570 47. Caporaso JG, Lauber CL, Walters WA, Berg-Lyons D, Lozupone CA, Turnbaugh PJ,  
571 Knight R. 2011. Global patterns of 16S rRNA diversity at a depth of millions of  
572 sequences per sample. *P Natl Acad Sci USA* 108: 4516-4522.
- 573 48. Magoč T, Salzberg SL. 2011. FLASH: fast length adjustment of short reads to  
574 improve genome assemblies. *Bioinformatics* 27: 2957-2963.
- 575 49. Caporaso JG, Kuczynski J, Stombaugh J, Bittinger K, Bushman FD, Costello EK,  
576 Knight R. 2010. QIIME allows analysis of high-throughput community sequencing  
577 data. *Nat Methods* 7: 335-336.
- 578 50. Rognes T, Flouri T, Nichols B, Quince C, Mahé F. 2016. VSEARCH: a versatile open  
579 source tool for metagenomics. *Peer J* 4: 2584.
- 580 51. Wang Q, Garrity GM, Tiedje JM, Cole JR. 2007. Naive Bayesian classifier for rapid  
581 assignment of rRNA sequences into the new bacterial taxonomy. *Appl Environ*  
582 *Microbiol* 73: 5261-5267.
- 583 52. Haas BJ, Gevers D, Earl AM, Feldgarden M, Ward DV, Giannoukos G, Ciulla D,  
584 Tabbaa D, Highlander SK, Sodergren E, Methé B, DeSantis TZ. 2011. Human  
585 Microbiome Consortium, Petrosino JF, Knight R, Birren BW,. Chimeric 16S  
586 rRNA sequence formation and detection in Sanger and 454-pyrosequenced PCR  
587 amplicons. *Genome Res* 21: 494-504.
- 588 53. Edgar RC. 2013. UPARSE: highly accurate OTU sequences from microbial amplicon

589 reads. Nat Methods 10: 996-998.

590 54. Aßhauer KP, Wemheuer B, Daniel R, Meinicke P. 2015. Tax4Fun: predicting

591 functional profiles from metagenomic 16S rRNA data. Bioinformatics 31: 2882-2884.

592 55. Segata N, Izard J, Waldron L, Gevers D, Miropolsky L, Garrett WS, Huttenhower C.

593 2011. Metagenomic biomarker discovery and explanation. Genome Biol 12: 1-18.

594

595

596

597

598

599

600

601

602

603

604

605

606

607

608

609

610 **Table 1 Rumen fermentative parameters of lambs**

| Items                               | Pelleted | Textured | SEM  | <i>P</i> -value |
|-------------------------------------|----------|----------|------|-----------------|
| Pre-weaning                         |          |          |      |                 |
| pH                                  | 5.96     | 5.60     | 0.12 | 0.061           |
| Total volatile fatty acids (mmol/L) | 24.41    | 30.04    | 1.72 | 0.046           |
| )                                   |          |          |      |                 |
| Acetate (mmol/L)                    | 13.94    | 15.56    | 1.30 | 0.414           |
| Propionate (mmol/L)                 | 6.69     | 9.07     | 0.72 | 0.046           |
| Butyrate (mmol/L)                   | 2.02     | 3.16     | 0.19 | 0.006           |
| Isobutyrate (mmol/L)                | 0.34     | 0.48     | 0.05 | 0.110           |
| Valerate (mmol/L)                   | 0.85     | 1.08     | 0.21 | 0.465           |
| Isovalerate (mmol/L)                | 0.56     | 0.70     | 0.09 | 0.320           |
| Acetate to propionate               | 2.16     | 1.76     | 0.26 | 0.308           |
| Ammonia nitrogen (mg/100ml)         | 12.51    | 14.87    | 0.93 | 0.107           |
| Post-weaning                        |          |          |      |                 |
| pH                                  | 5.48     | 5.14     | 0.07 | 0.011           |
| Total volatile fatty acids (mmol/L) | 65.59    | 70.72    | 1.51 | 0.046           |
| )                                   |          |          |      |                 |
| Acetate (mmol/L)                    | 38.89    | 38.02    | 1.65 | 0.739           |
| Propionate (mmol/L)                 | 16.73    | 21.56    | 1.49 | 0.044           |
| Butyrate (mmol/L)                   | 5.79     | 7.67     | 0.50 | 0.023           |
| Isobutyrate (mmol/L)                | 0.45     | 0.46     | 0.04 | 0.989           |
| Valerate (mmol/L)                   | 3.03     | 2.20     | 0.58 | 0.332           |
| Isovalerate (mmol/L)                | 0.70     | 0.81     | 0.08 | 0.317           |
| Acetate to propionate               | 2.52     | 1.81     | 0.29 | 0.153           |
| Ammonia nitrogen (mg/100ml)         | 12.25    | 12.75    | 0.82 | 0.677           |

611

612

613

614

615

616

617

618

619 ***Table 2 Alpha diversities of rumen bacterial communities***

| Items        | Pelleted | Textured | SEM   | <i>P-value</i> |
|--------------|----------|----------|-------|----------------|
| Pre-weaning  |          |          |       |                |
| OTU          | 415.80   | 352.20   | 40.79 | 0.066          |
| ACE          | 421.40   | 374.85   | 44.74 | 0.146          |
| Chao1        | 415.79   | 406.93   | 94.83 | 0.893          |
| Shannon      | 3.74     | 4.09     | 0.27  | 0.407          |
| Simpson      | 0.78     | 0.84     | 0.09  | 0.323          |
| Post-weaning |          |          |       |                |
| OTU          | 279.00   | 258.40   | 48.90 | 0.557          |
| ACE          | 282.18   | 263.49   | 43.66 | 0.556          |
| Chao1        | 272.76   | 258.52   | 40.10 | 0.645          |
| Shannon      | 3.61     | 3.44     | 0.57  | 0.662          |
| Simpson      | 0.81     | 0.79     | 0.09  | 0.766          |

620

621

622

623

624

625

626

627

628

629

630

631

632

633 **Table 3**

634 ***Ingredients and chemical composition of the experimental diets***

| Item                                 | Pelleted | Textured |
|--------------------------------------|----------|----------|
| Ingredients (g/kg)                   |          |          |
| Alfalfa hay                          | 50.00    | 50.00    |
| Corn grain, ground                   | 650.00   | -        |
| Corn grain, steam flaked             | -        | 650.00   |
| Wheat bran                           | 50.00    | 50.00    |
| Expanded soybean                     | 60.00    | 60.00    |
| Soybean meal                         | 165.00   | 165.00   |
| Salt                                 | 3.00     | 3.00     |
| Calcium carbonate                    | 11.80    | 11.80    |
| Vitamin and mineral mix <sup>a</sup> | 10.00    | 10.00    |
| Sweetening agent                     | 0.20     | 0.20     |
| Total                                | 1000.00  | 1000.00  |
| Chemical composition (g/kg, DM)      |          |          |
| Apparent digestible energy b(MJ/kg)  | 13.75    | 13.82    |
| Dry Matter <sup>b</sup>              | 892.40   | 885.00   |
| Crude Protein <sup>b</sup>           | 214.60   | 216.40   |
| Ether extract <sup>b</sup>           | 27.20    | 27.90    |
| Neutral detergent fiber <sup>b</sup> | 128.00   | 128.80   |
| Non-fiber carbohydrates <sup>c</sup> | 625.10   | 622.20   |
| Starch <sup>b</sup>                  | 115.10   | 117.10   |
| Calcium <sup>b</sup>                 | 7.50     | 7.10     |
| Total phosphorus <sup>b</sup>        | 4.48     | 4.52     |

635 <sup>a</sup> Provided per kilogram of premix: Fe 75000 mg, Zn 15000 mg, Cu 3500 mg, Mn 15000 mg, I

636 500000 mg, Se 50 mg, Co 200 mg, VA 2500000 IU, VD 1000000 IU, VE 1900 IU.

637 <sup>b</sup> The actual values for measurement.

638 <sup>c</sup> Non-fiber carbohydrates=1000 – (crude protein + ether extract + aNDF + ash) (NRC, 2001).

639

640

641



642

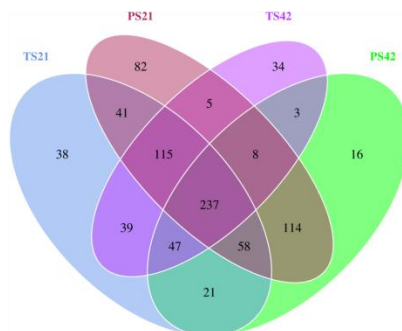

643

644

Fig 1 Venn graph

645

646

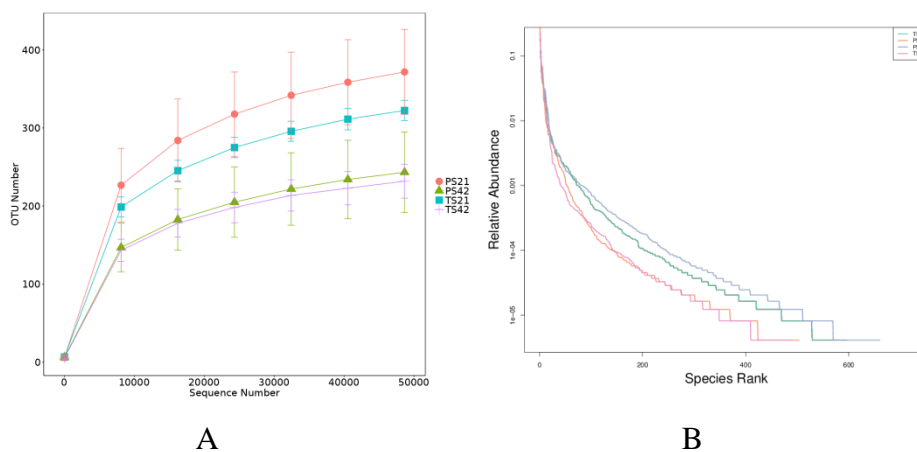

647

648

649

Fig 2 Rarefaction curve and Rank abundance of 16S rRNA gene

650

Note: A, rarefaction curve; B, rank abundance.

651

652

653

654

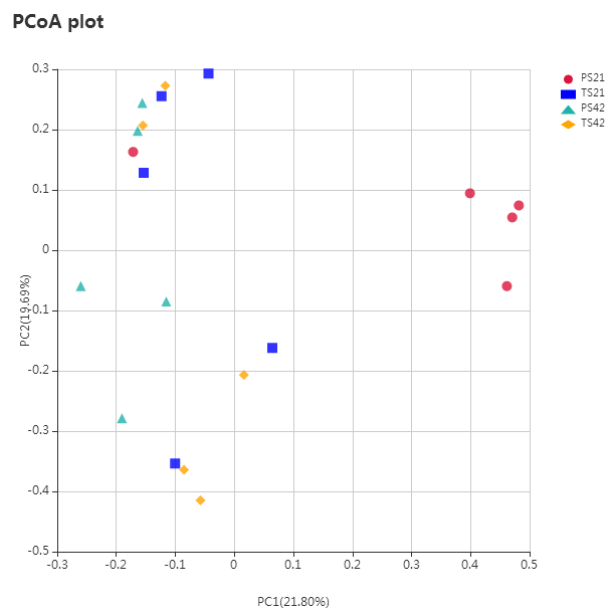

655

656

Fig 3 Principal co-ordinates analysis (PCoA) of rumen bacterial OTUs

657

658

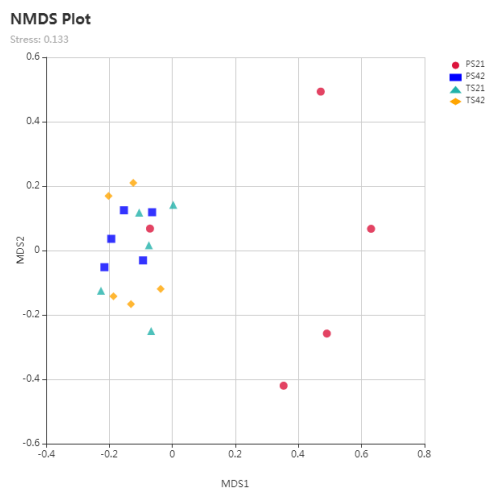

659

660

Fig 4 Non-metric multi-dimensional scaling analysis (NMDS) of rumen bacterial OTUs

661

662

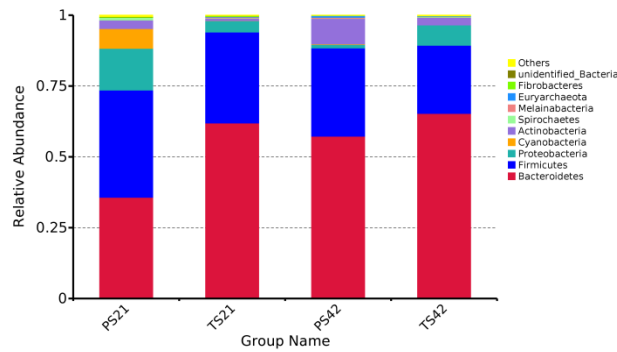

663

664

Fig 5 Phylum of top 10 of rumen microbe for lambs

665

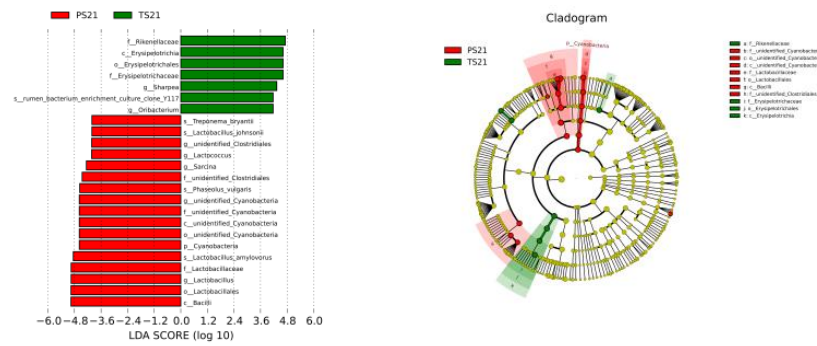

666

667 Fig 6 Value of linear discriminant analysis (LDA) effect size (LEf Se) on rumen

668

microflora between two starter feeds for pre-weaned lambs

669

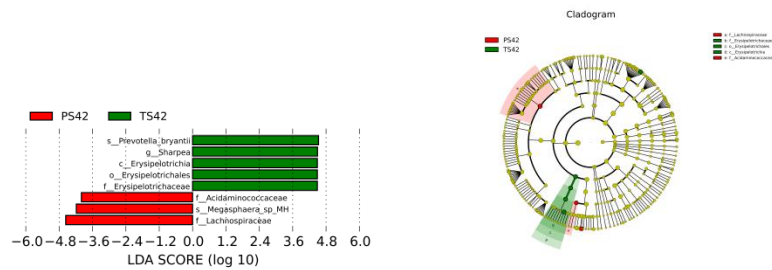

670

671 Fig 7 Value of linear discriminant analysis (LDA) effect size (LEf Se) on rumen

672

microflora between two starter feeds for post-weaned lambs

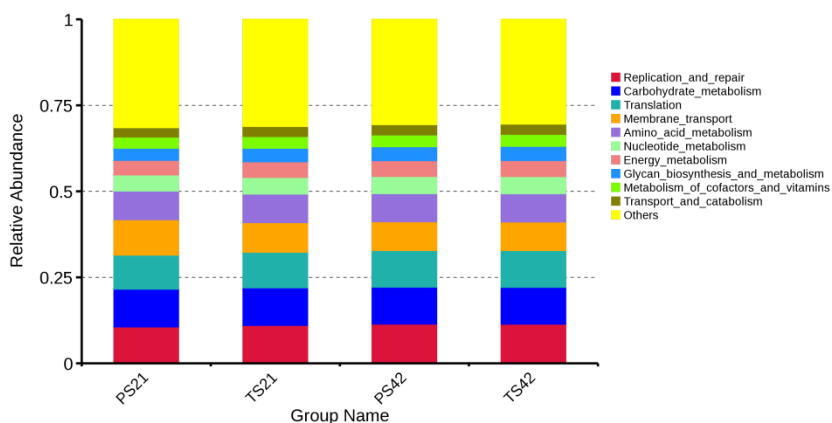

673

674 Fig 8 Relative abundances of top 10 function of rumen microflora between two starter

675 feeds for pre-weaning and post-weaned lambs (KEGG level 2 pathways)

676

677

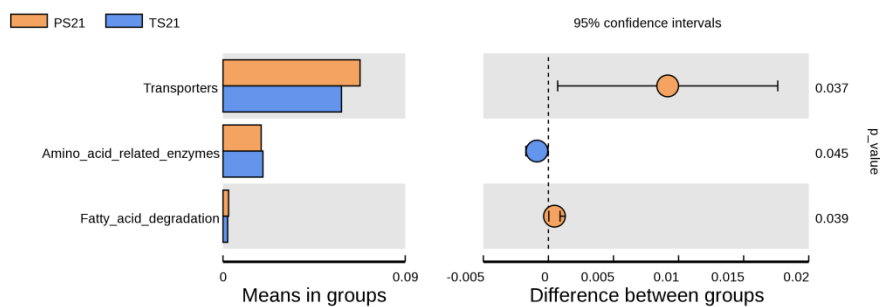

678

679 Fig 9 Analysis of different metabolism pathways between two starter feeds for

680 pre-weaning lambs (KEGG level 3 pathways)

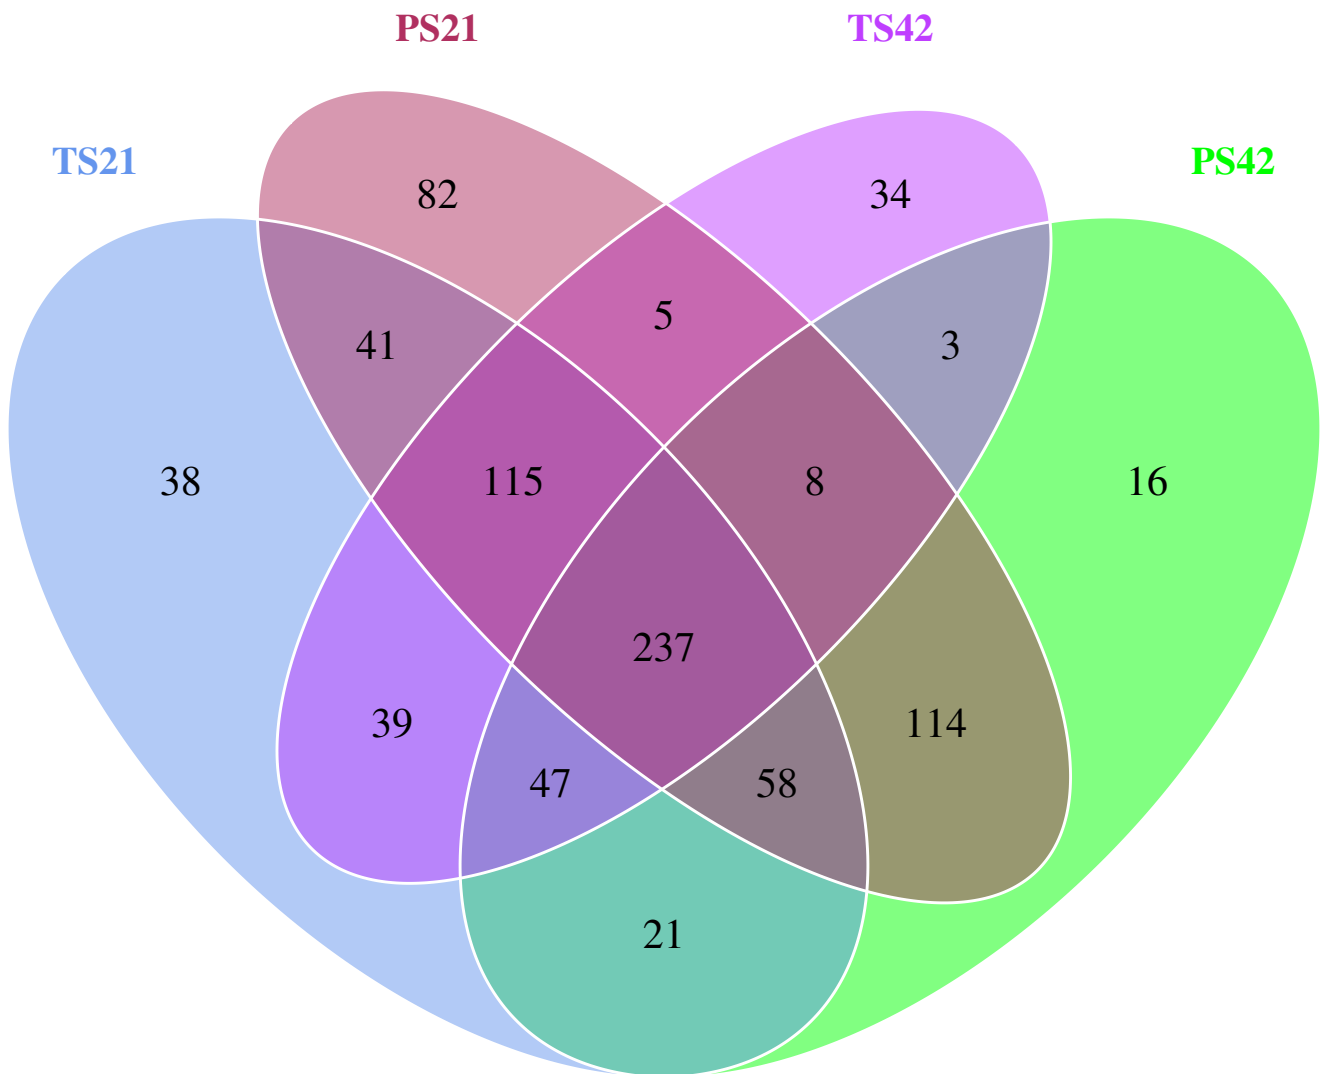

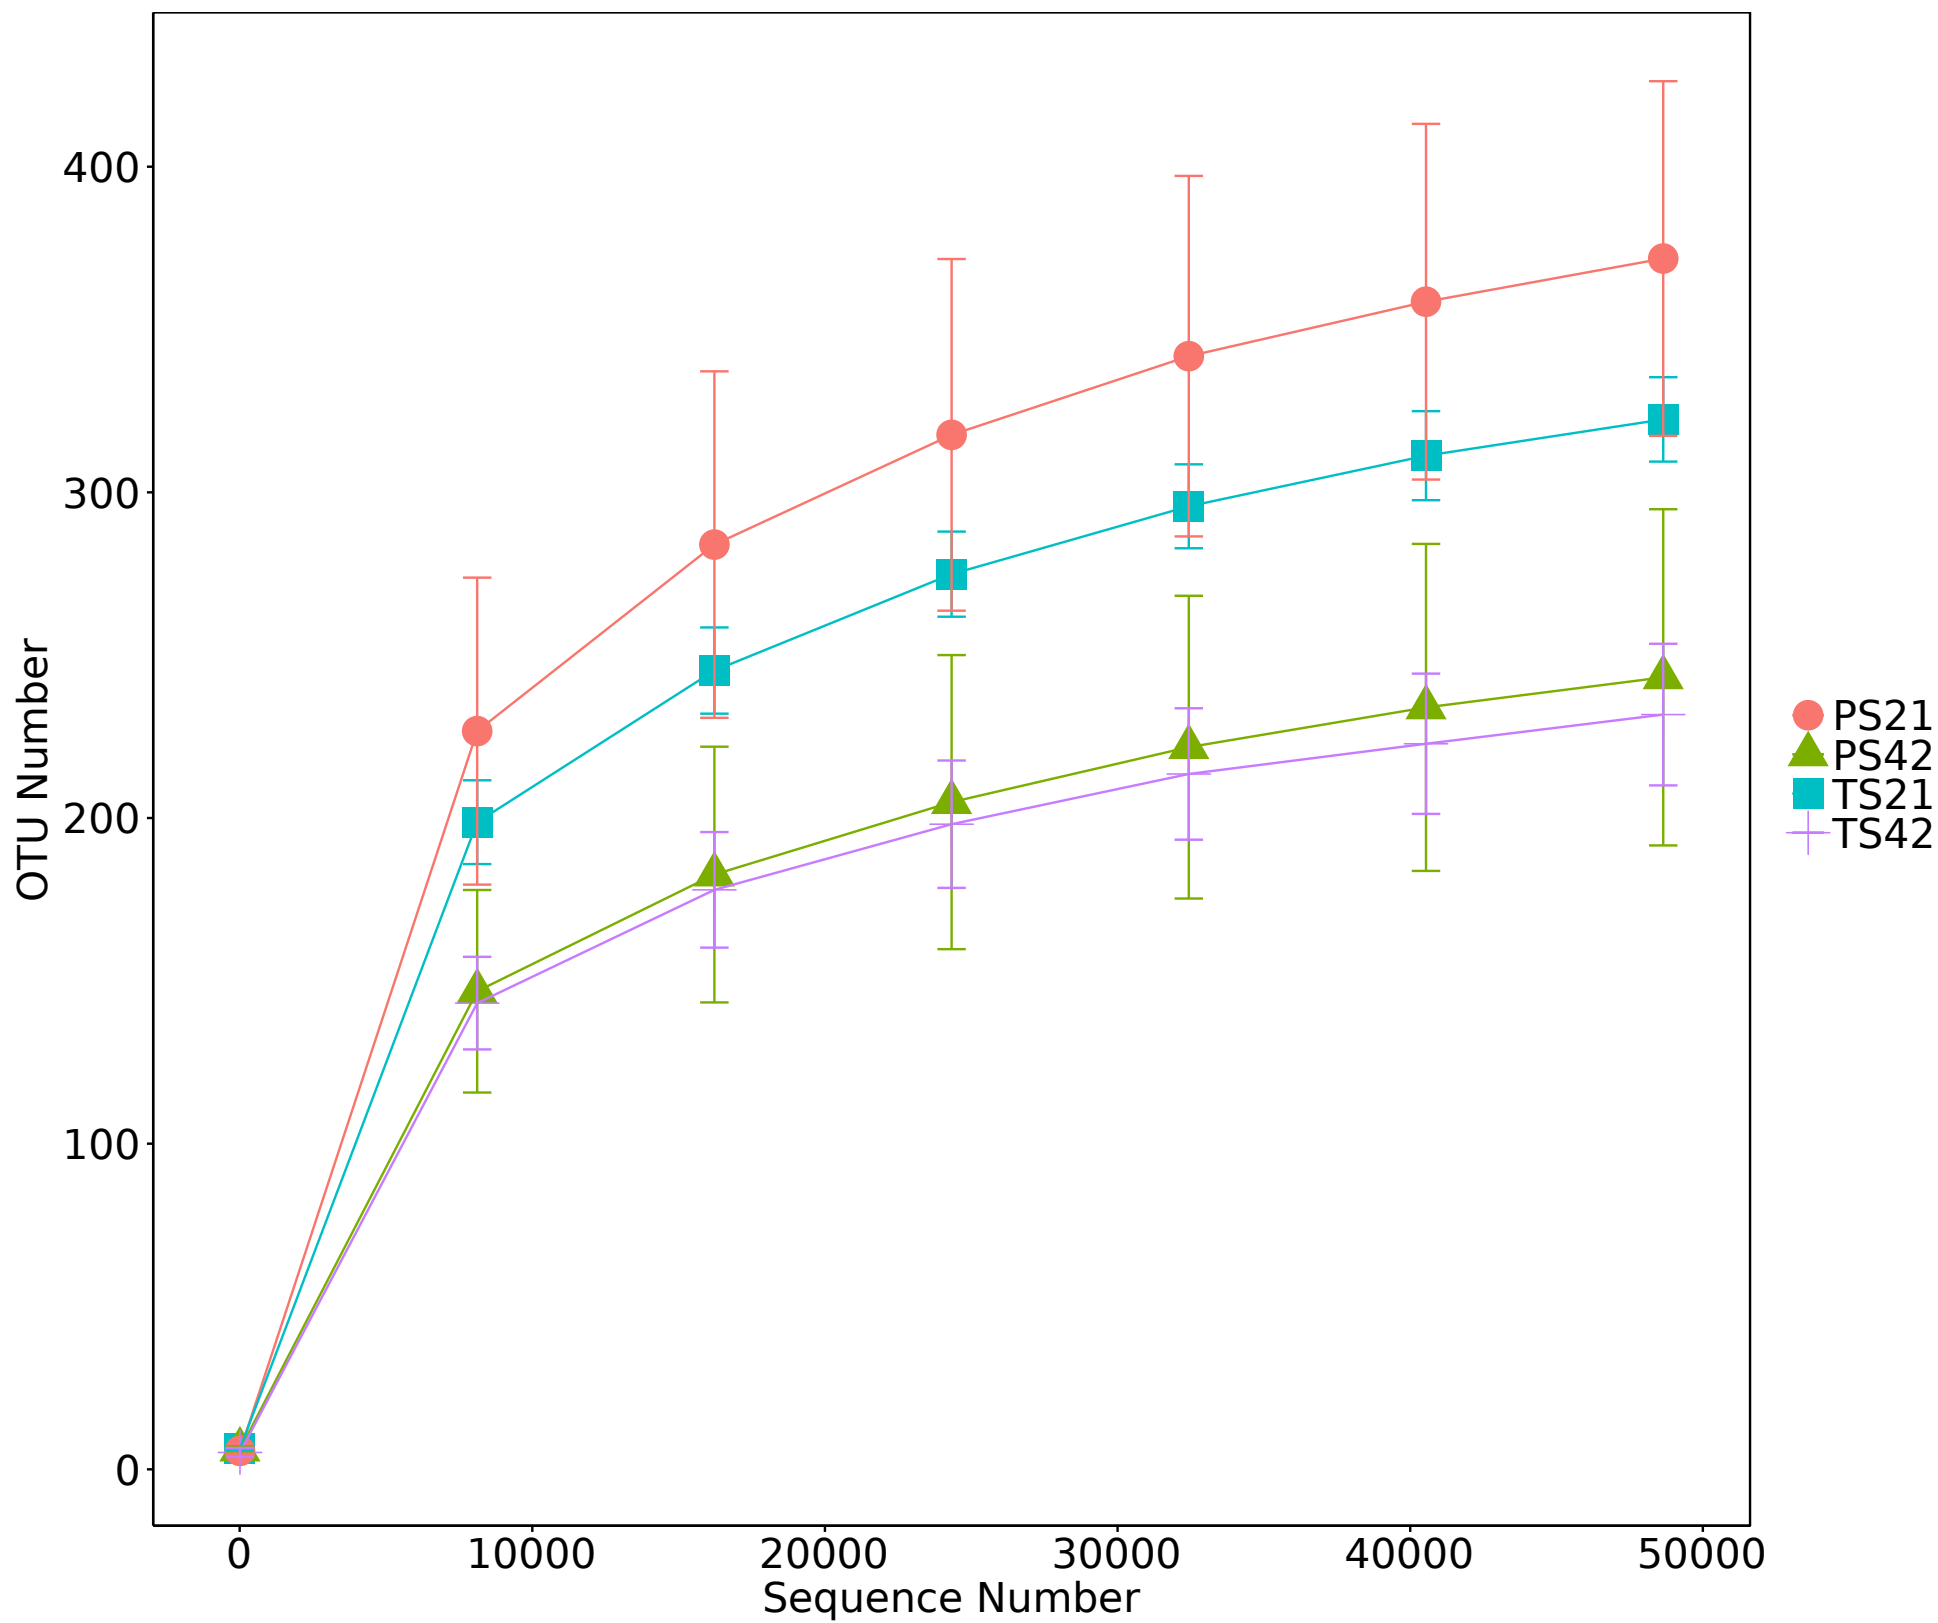

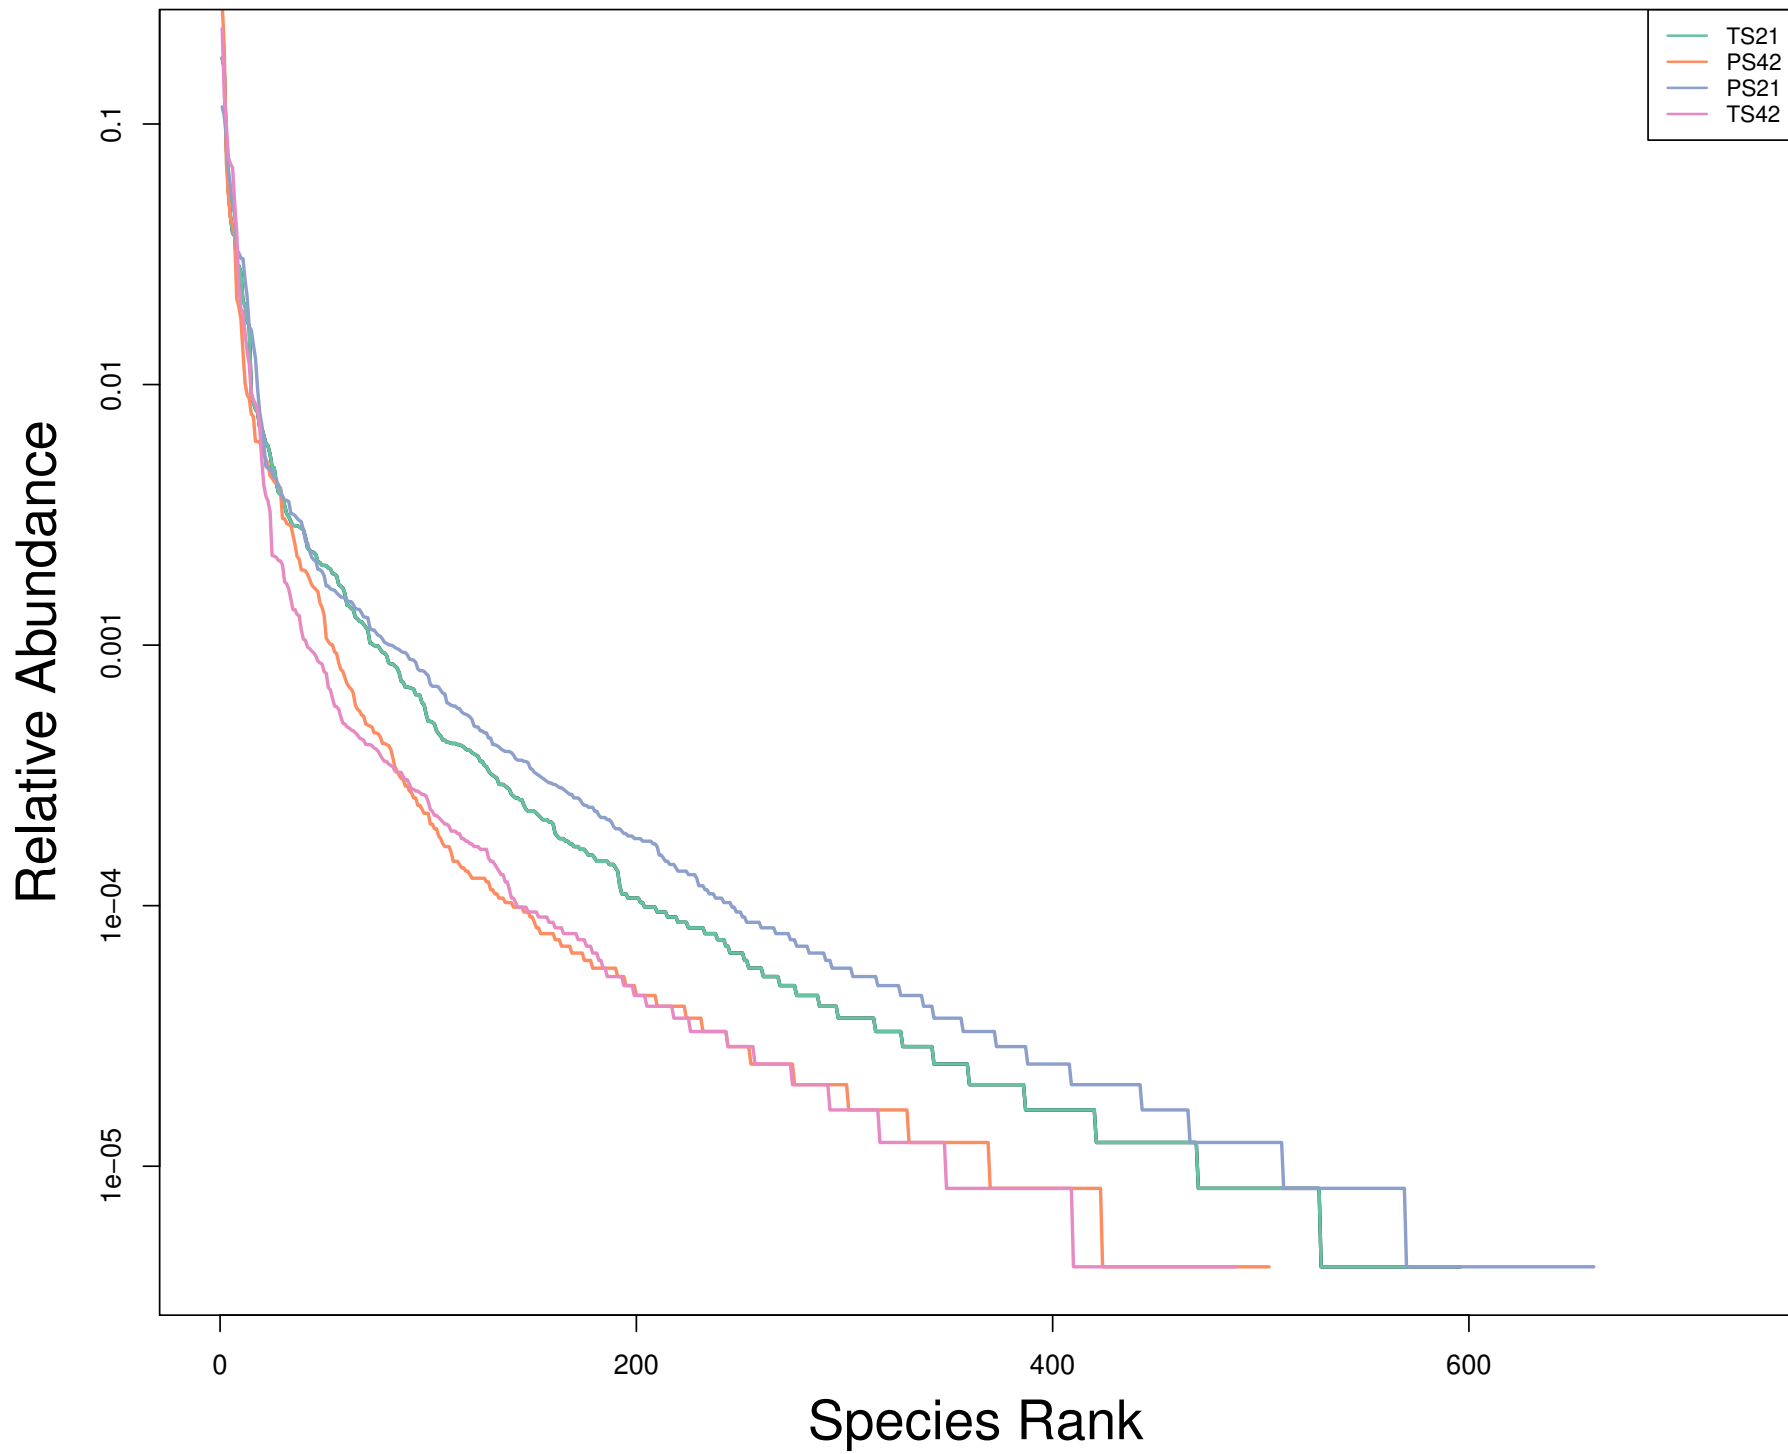

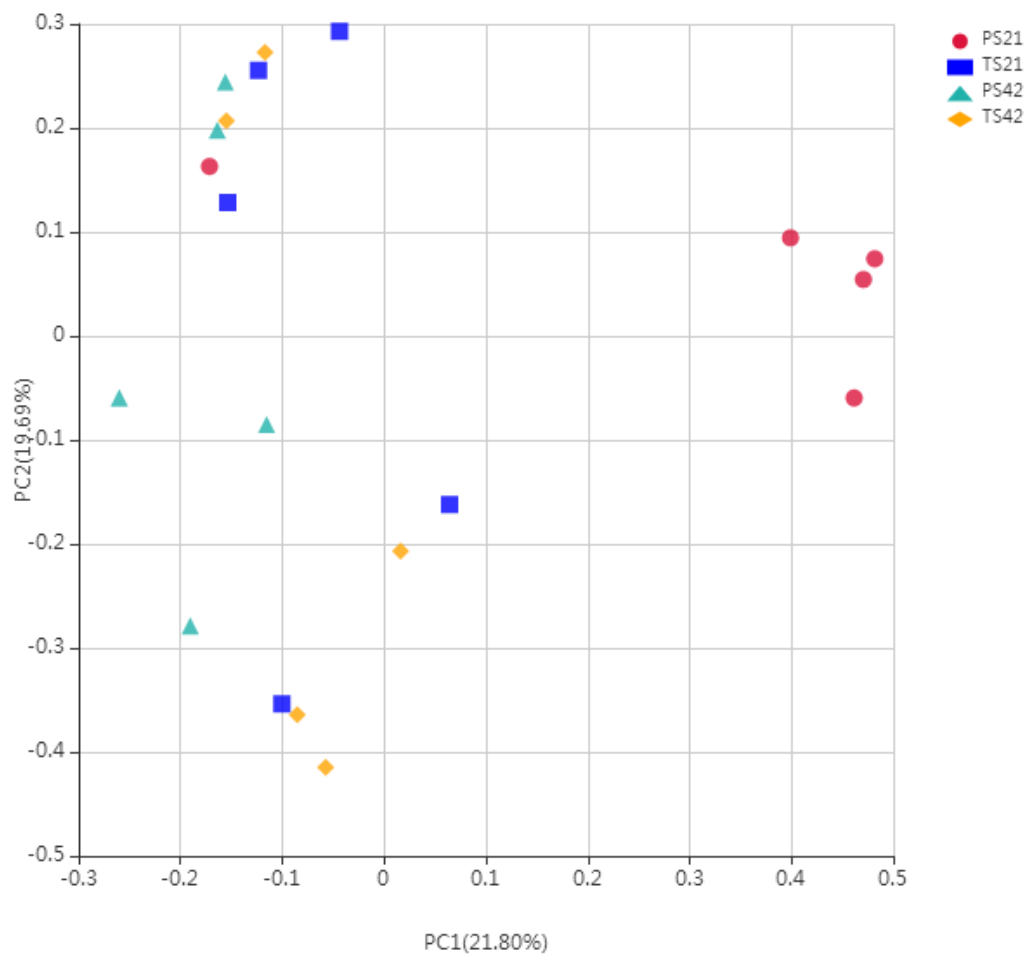



Stress: 0.133

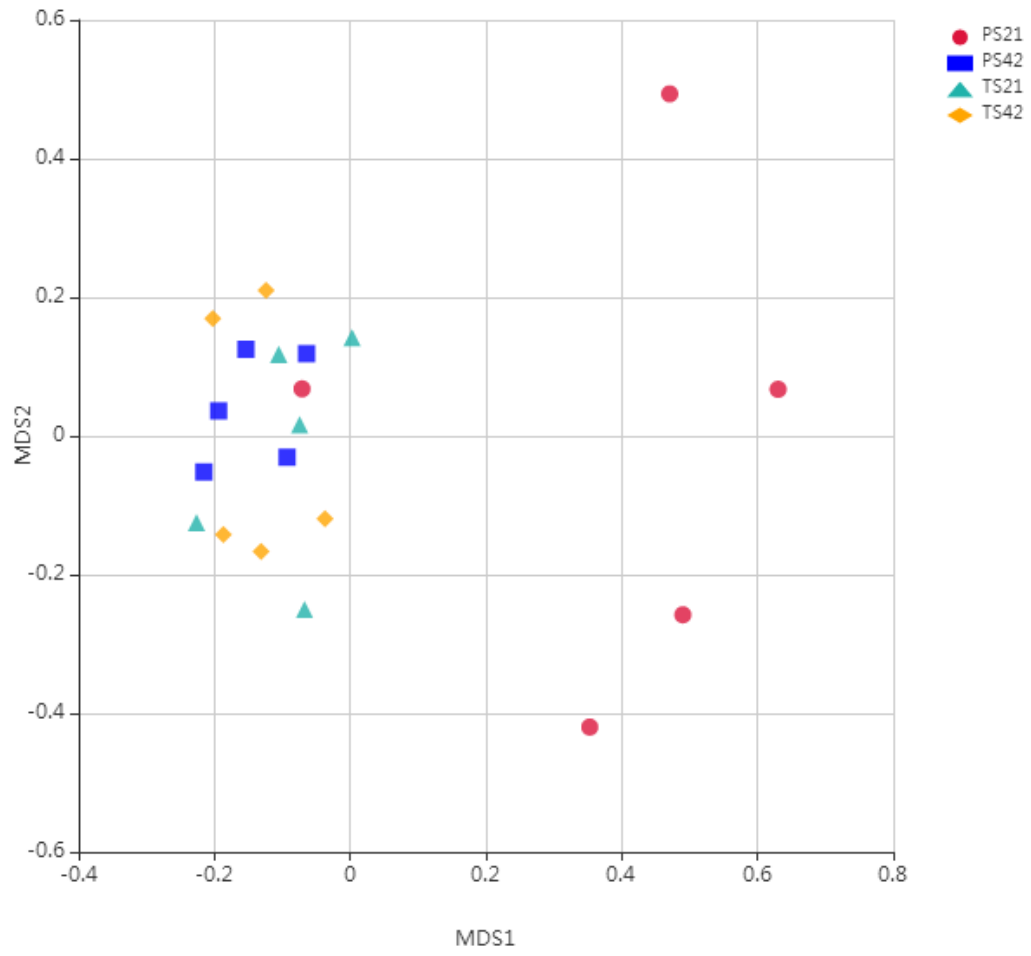



PS21 TS21

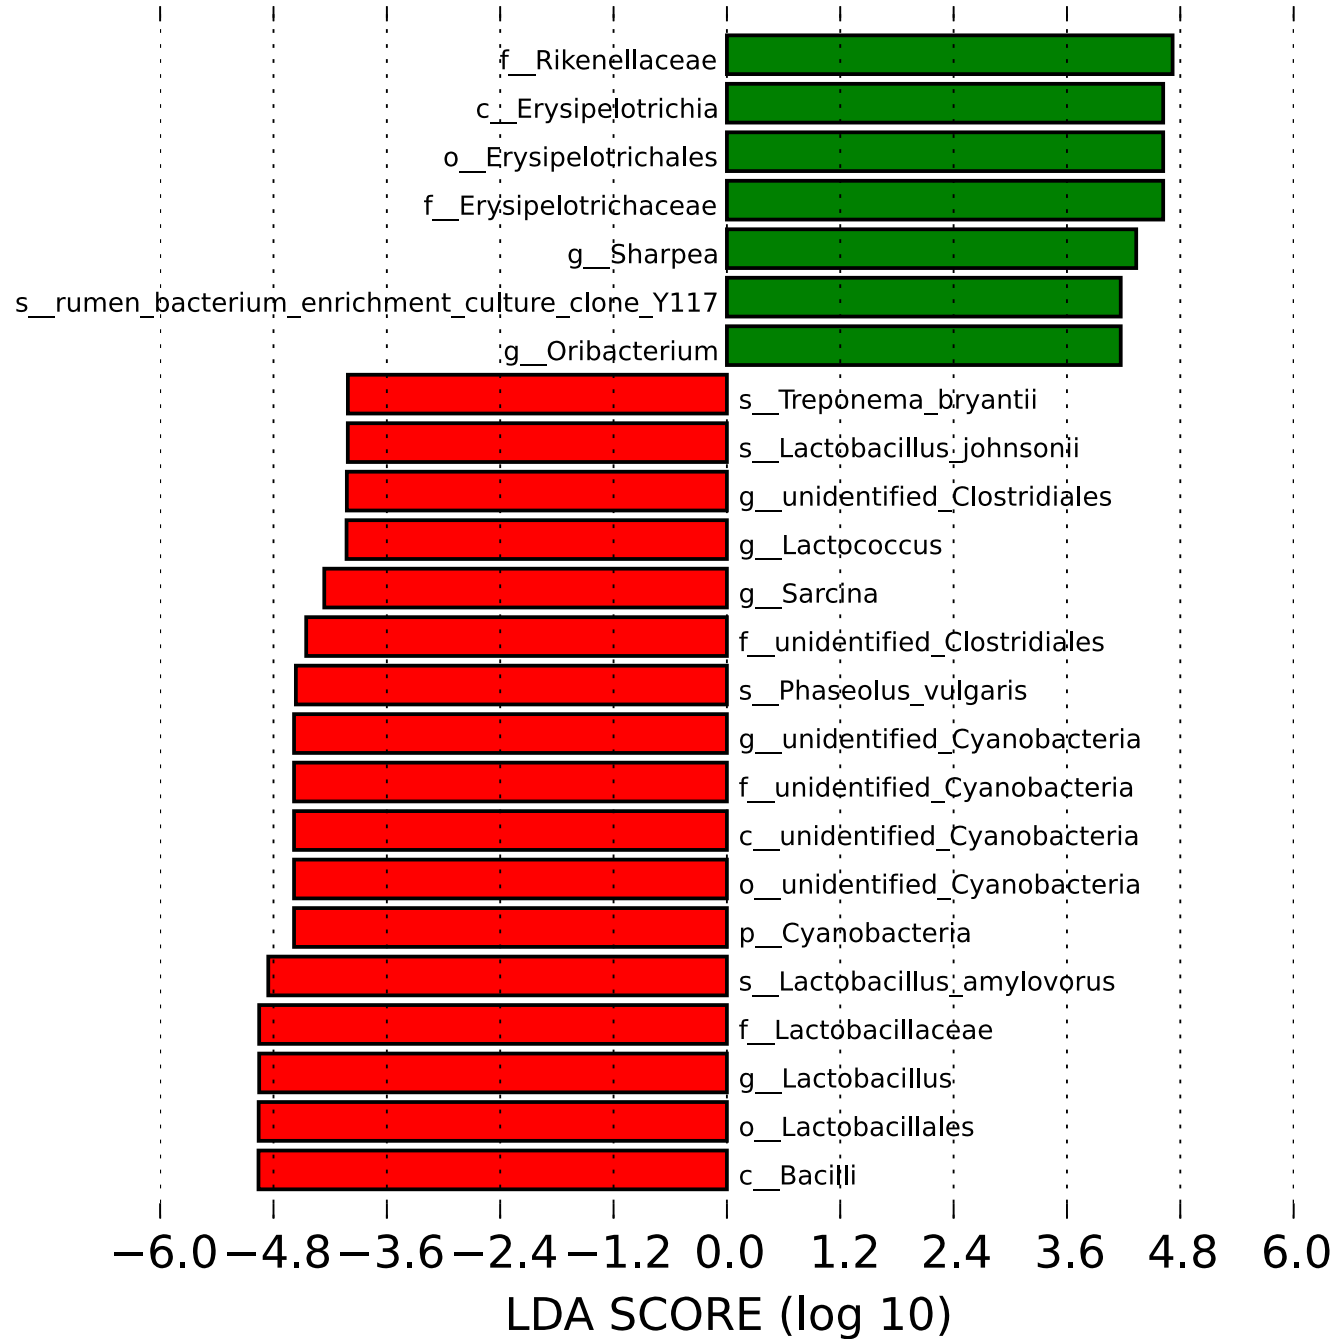

# Cladogram

- PS21
- TS21

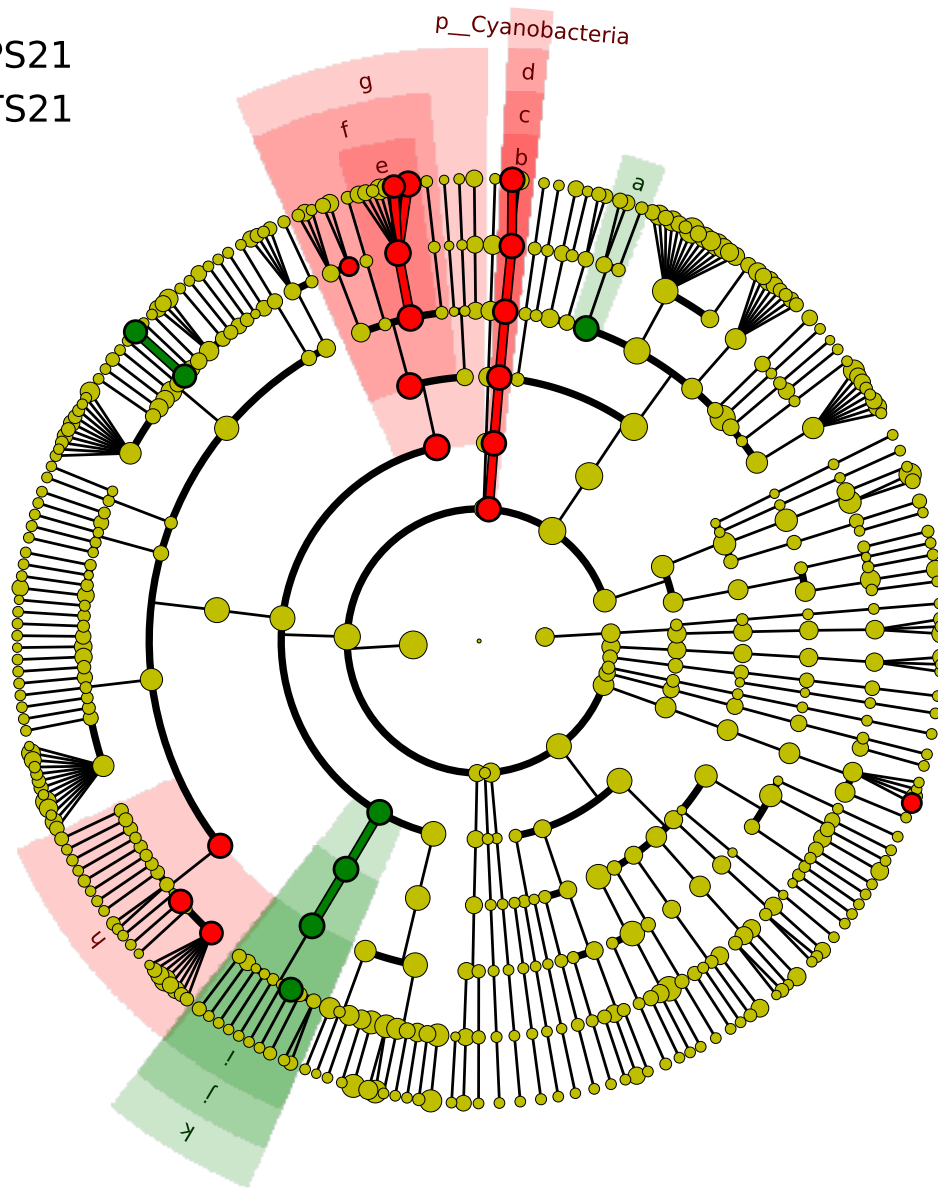

- a: f\_Rikenellaceae
- b: f\_unidentified\_Cyanobacter
- c: o\_unidentified\_Cyanobacter
- d: c\_unidentified\_Cyanobacter
- e: f\_Lactobacillaceae
- f: o\_Lactobacillales
- g: c\_Bacilli
- h: f\_unidentified\_Clostridiales
- i: f\_Erysipelotrichaceae
- j: o\_Erysipelotrichales
- k: c\_Erysipelotrichia

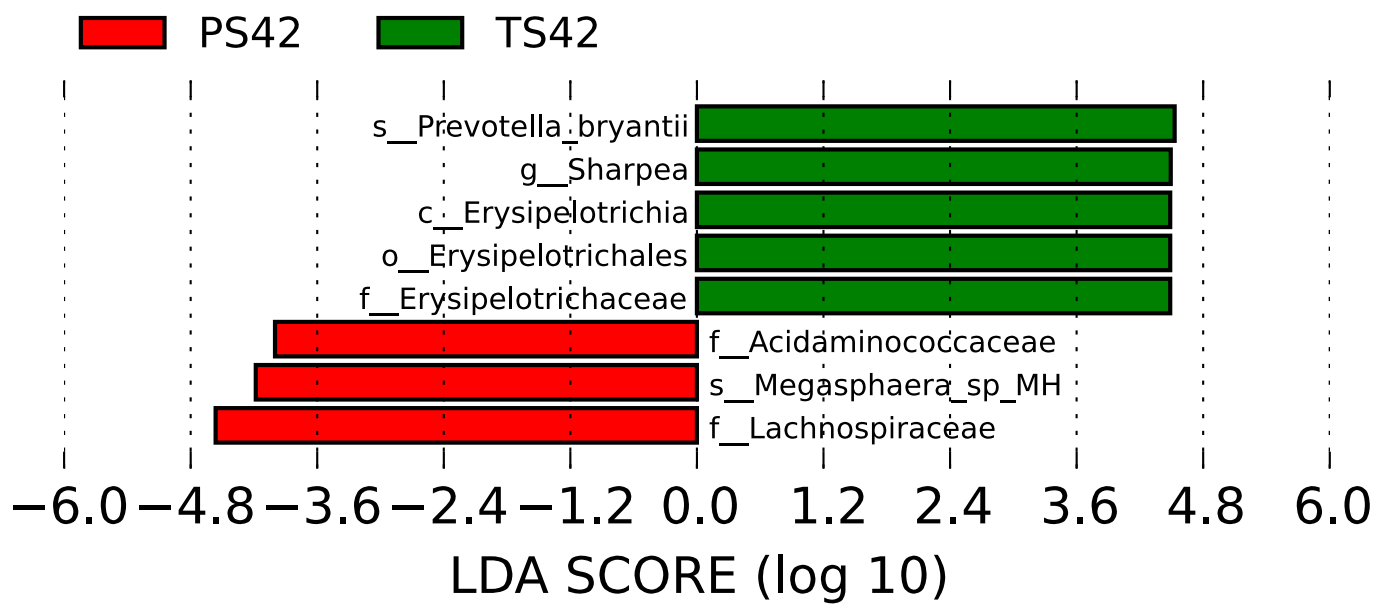

# Cladogram

PS42  
TS42

a: f\_Lachnospiraceae  
b: f\_Erysipelotrichaceae  
c: o\_Erysipelotrichales  
d: c\_Erysipelotrichia  
e: f\_Acidaminococcaceae

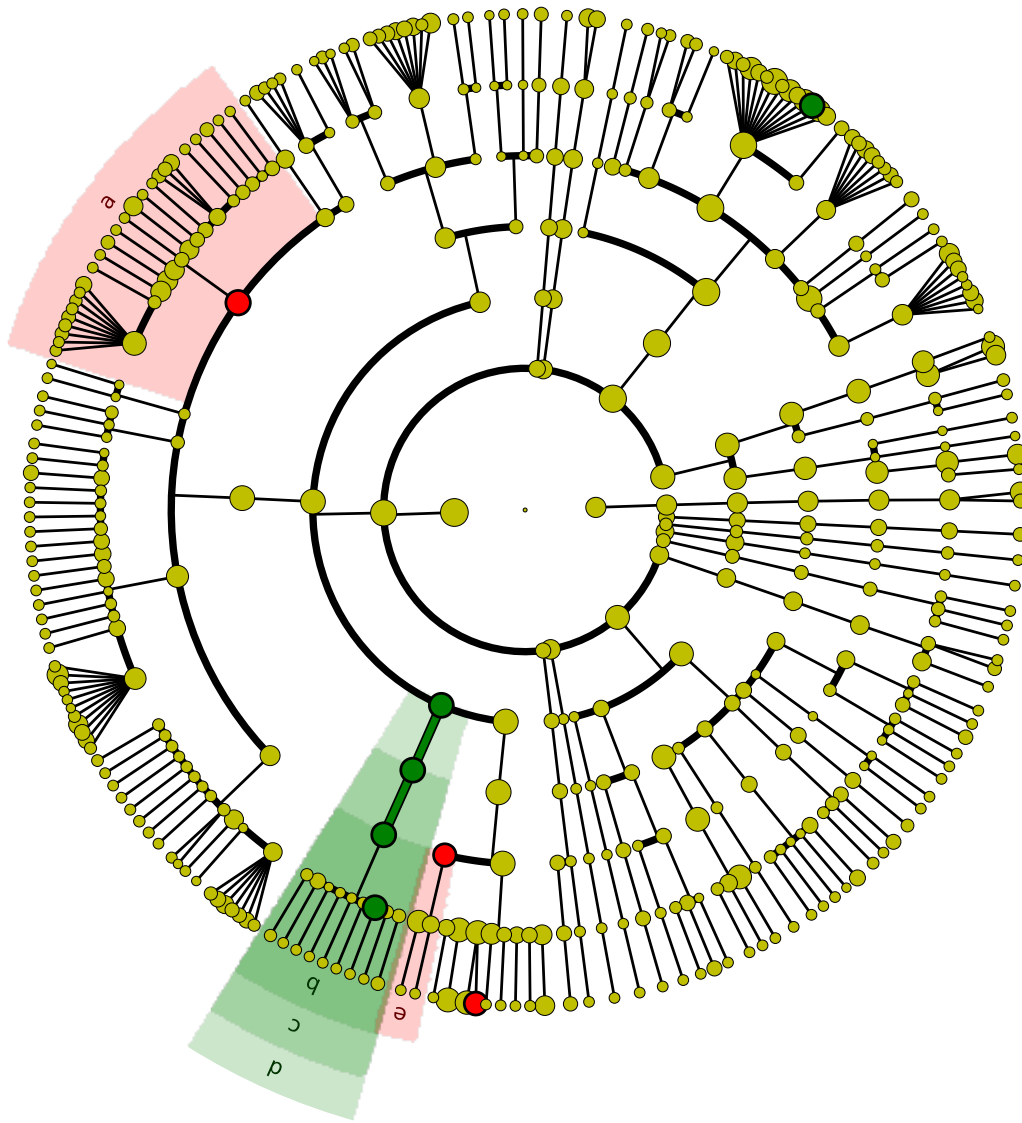

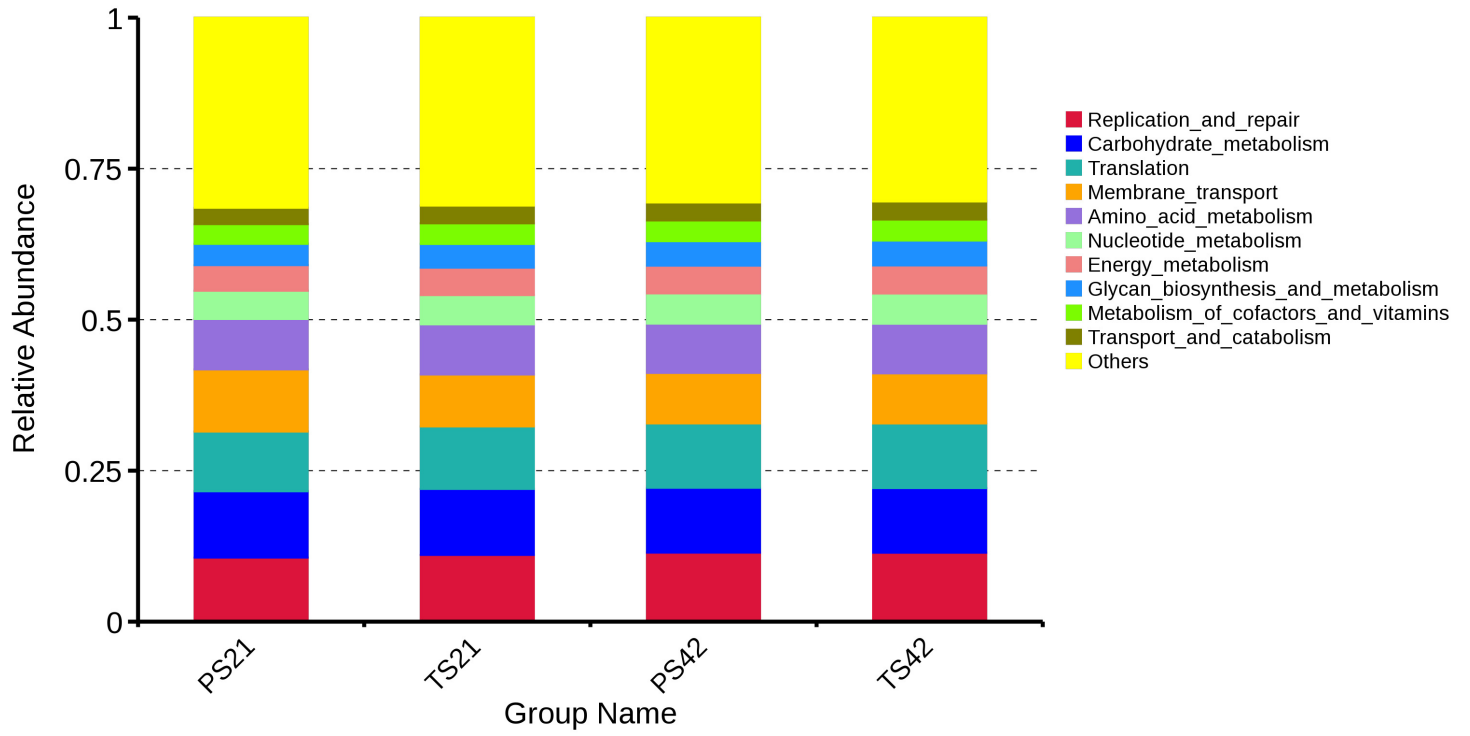

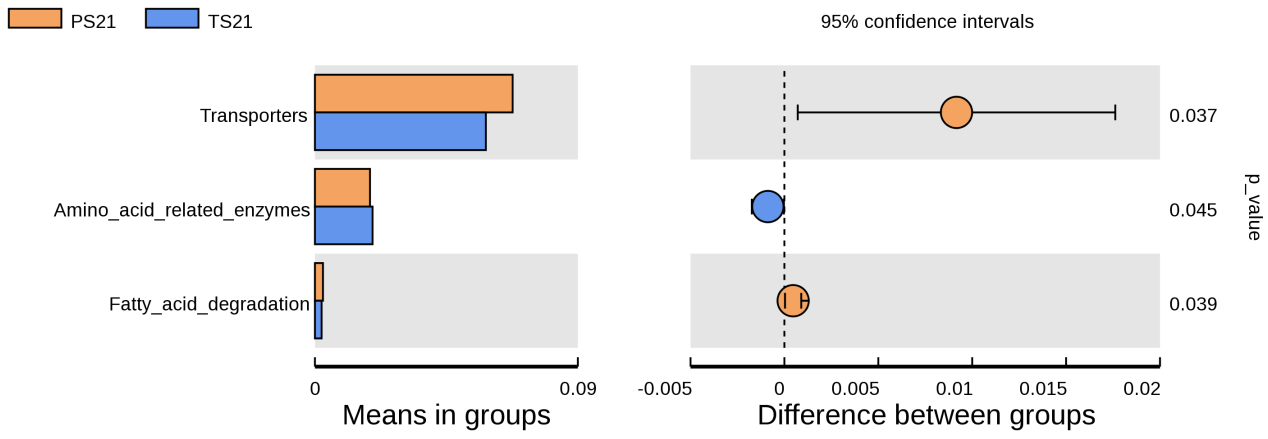

Source: https://www.biorxiv.org/content/10.1101/2020.08.03.235580v1.full.pdf
